# 1 Controlling protein nanocage assembly with 2 hydrostatic pressure

3 *Kristian Le Vay*<sup>1,2</sup>, *Ben M. Carter*<sup>3</sup>, *Daniel W. Watkins*<sup>1</sup>, *T-Y. Dora Tang*<sup>1</sup>, *Valeska P.*  
4 *Ting*<sup>4</sup>, *Helmut Cölfen*<sup>5</sup>, *Robert P. Rambo*<sup>6</sup>, *Andrew J. Smith*<sup>6</sup>, *J. L. Ross*  
5 *Anderson*<sup>\*,1,7</sup>, *Adam W. Perriman*<sup>\*,3</sup>

6 <sup>1</sup>School of Biochemistry, University of Bristol, University Walk, Bristol, BS8 1TD,  
7 UK.

8 <sup>2</sup>Bristol Centre for Functional Nanomaterials, HH Wills Physics Laboratory,  
9 University of Bristol, Tyndall Avenue, Bristol, BS8 1TL, UK.

10 <sup>3</sup>School of Cellular and Molecular Medicine, University of Bristol, University Walk,  
11 Bristol, BS8 1TD, UK.

12 <sup>4</sup>Bristol Composites Institute (ACCIS), University of Bristol, Queen's Building BS8  
13 1TR, UK

14 <sup>5</sup>Department of Chemistry, University of Konstanz, Universitätsstraße 10, 78457  
15 Konstanz, Germany

16  
17 <sup>6</sup>Diamond Light Source Ltd., Diamond House, Harwell Science and Innovation  
18 Campus, Fermi Ave, Didcot OX11 0DE, UK

19  
20 <sup>7</sup>BrisSynBio Synthetic Biology Research Centre, Life Sciences Building, University of  
21 Bristol, Tyndall Avenue, Bristol, BS8 1TQ, UK.

22 \*Email: [ross.anderson@bristol.ac.uk](mailto:ross.anderson@bristol.ac.uk), [chawp@bristol.ac.uk](mailto:chawp@bristol.ac.uk)

23 **Controlling the assembly and disassembly of nanoscale protein cages for the**  
24 **capture and internalisation of protein or non-proteinaceous components is**  
25 **fundamentally important to a diverse range of bionanotechnological**  
26 **applications. Here, we study the reversible, pressure-induced dissociation of a**  
27 **natural protein nanocage, *E. coli* bacterioferritin (Bfr), using synchrotron**  
28 **radiation small angle X-ray scattering (SAXS) and circular dichroism (CD). We**  
29 **demonstrate that hydrostatic pressures of 450 MPa are sufficient to completely**  
30 **dissociate the Bfr icositetramer into protein dimers, and the reversibility and**  
31 **kinetics of the reassembly process can be controlled by selecting appropriate**  
32 **buffer conditions. We also demonstrate that the heme B prosthetic group**  
33 **present at the subunit dimer interface influences the stability and pressure**  
34 **lability of the cage, despite its location being discrete from the inter-dimer**  
35 **interface that is key to cage assembly. This indicates a major cage-stabilising**  
36 **role for heme within this family of ferritins.**

37

38 Nanoscale protein cages are attractive scaffolds for bionanotechnology and materials  
39 science, where they can be exploited as platforms for constructing robust and  
40 configurable therapeutic delivery vectors<sup>1</sup>, vaccines<sup>2</sup>, nanoreactors<sup>3,4</sup> and templates  
41 for the synthesis of diverse nanomaterials<sup>5-8</sup>. These multifunctional containers, both  
42 natural<sup>9-13</sup> and designed<sup>14,15</sup>, offer unparalleled control over size, shape,  
43 microenvironment, surface functionalisation and stability when constructing novel  
44 bionanomaterials.

45

46 The ability to control the assembly of such nanocages is an invaluable tool in the  
47 synthesis of complex materials, and can be instrumental in facilitating the

48 encapsulation of non-native nanomaterials. While this can be achieved by exploiting  
49 natural<sup>16–18</sup> or engineered<sup>19–21</sup> cage metastability, the use of such nanocages could  
50 ultimately compromise the robustness of the final assembled material. For nanocages  
51 with higher relative stability, harsher environmental conditions<sup>22,23</sup> are required that  
52 can adversely affect the protein cage, its functional modifications or the intended  
53 payload for encapsulation. Therefore, new methods are required to circumvent the  
54 necessity for harsh chemical conditions or specific interfacial engineering to promote  
55 cage instability, and to realise the full potential of these cages in bionanotechnology.

56

57 Here, we report on how hydrostatic pressure can be employed to control the  
58 disassembly and reassembly of the protein nanocage bacterioferritin from *E. coli* (Bfr).  
59 While hydrostatic pressure has been previously employed to dissociate the weakly  
60 stable cage-like assembly HSP26<sup>24</sup>, the structure is not truly hollow<sup>25</sup>. There are  
61 currently no reports of complete, reversible hydrostatic pressure-induced dissociation  
62 in a highly robust nanocage such as ferritin<sup>26,27</sup>. While hydrostatic pressure has been  
63 applied to human ferritin to facilitate the loading of doxorubicin and increase protein  
64 recovery<sup>27</sup>, the assembly/disassembly of the cage under pressure was not  
65 investigated. Specifically, we use synchrotron radiation small angle X-ray scattering  
66 (SAXS)<sup>28</sup> to show that the Bfr nanocage dissociates reversibly under pressure, and  
67 that the reassembly can be controlled by altering solution conditions. Hydrostatic  
68 pressures of 450 MPa were sufficient to induce reversible dissociation of the Bfr  
69 icositetramer into subunit dimers, and the reversibility of the pressure-induced  
70 dissociation was found to be highly dependent on ionic strength and temperature,  
71 allowing for control of oligomerisation state through pressurisation and selection of  
72 buffer conditions. Furthermore, we demonstrate that the pressure lability of the

73 nanocage can be modulated by removal of the native heme B prosthetic group. Our  
74 study exploits the ability of SAXS to probe the quaternary, tertiary and secondary  
75 structure of proteins, and will provide not only the means for studying the  
76 supramolecular assembly of these highly valuable nanocages, but also inform future  
77 methodologies for controlling protein nanocage assembly for efficient payload  
78 encapsulation.

79

## 80 **Results & Discussion**

81 We initially probed the pressure-induced dissociation of the core-free, or apo-,  
82 bacterioferritin icositetramer (ABfr) by gradually raising the applied hydrostatic  
83 pressure in a diamond-windowed SAXS pressure cell to 450 MPa in 25 MPa  
84 increments, equilibrating for 300 seconds prior to data collection at each pressure. An  
85 undulating scattering pattern was observed at low pressures (Figure 1a), characteristic  
86 of the hollow nanocage structure. With increasing pressure, fringes corresponding to  
87 the hollow sphere form factor broaden and then disappear, indicating increasing  
88 polydispersity and decreasing concentration of icositetramer due to dissociation into  
89 lower order oligomeric species. The presence of isosbestic points in the reciprocal  
90 space and Kratky data (Figure 1a and 1b), indicates that two species contribute to  $I(q)$   
91 with proportional stoichiometry. At higher pressures (> 300 MPa), a slight drift in the  $q$   
92 value of the isosbestic points is observed, suggesting additional species likely  
93 contribute to the dissociation process.

94

95 From the pair distance distribution factor ( $P(r)$ ), we determined the radius of gyration,  
96  $R_g$  (Figure 1c), which decreases non-linearly from 50 Å to 32 Å over the pressures  
97 applied here (Figure 1d). This non-linear change in  $R_g$  with pressure is due to the

98 power law dependence of  $R_g$  upon number of residues in the scattering particle<sup>29</sup>,  
99 rather than suggesting a cooperative dissociation mechanism. The data therefore  
100 indicate gradual icositetramer dissociation with multiple intermediates, and a final state  
101 in which the majority of species are small subunit oligomers. The  $P(r)$  distribution of  
102 ABfr is characteristic of a hollow sphere until 250 MPa. The maximum of this  
103 distribution,  $P(r)_{max}$  ( $r = 84 \text{ \AA}$ ), corresponds to the expected chord length for a hollow  
104 sphere and decreases steadily with pressure, indicating gradual loss of the  
105 icositetramer. At higher pressures, the magnitude at  $r = 84 \text{ \AA}$  tends to zero and a new  
106  $P(r)_{max}$  emerges at  $r = 32 \text{ \AA}$ , corresponding to a subunit oligomer of ABfr previously  
107 masked by the fully assembled cage. Importantly, the maximum observed diameter,  
108  $D_{max}$ , never exceeds the atmospheric pressure value, suggesting that aggregates of  
109 intact ABfr particles do not form at higher pressures and that dissociation of the particle  
110 into smaller oligomers predominates.

111  
112 Using a linear combination of theoretical SAXS data from various oligomeric  
113 components, we were able to identify possible dissociation pathways<sup>30,31</sup>. Our  
114 prediction of possible stable oligomers using the PISA (Proteins, Interfaces, Surfaces  
115 and Assemblies)<sup>32</sup> tool returned only the subunit dimer and icositetramer as stable  
116 states (Table S1). We then used single value decomposition (SVD) to determine how  
117 many components contribute to the observed variation in the pressure dissociation  
118 SAXS data (Figure S1 and S2), and then fitted the dataset using various combinations  
119 of oligomer structures derived from the ABfr icositetramer (Table S2, Figure S3 and  
120 S4). The SVD analysis indicated two or three major components, with the three most  
121 significant accounting for 93.5% of the total contributions (Figure S2). Two component  
122 models consisting of the icositetramer and a subunit oligomer provided the worst fits

123 of the dataset (Table S3, Figure S5), though of these, the model consisting of the  
124 icositetramer and dimer best represented the data. Three component models  
125 generally provided better representations of the dissociation dataset (Figure S5), and  
126 all models in which the dimer was the lowest oligomeric state gave the best fit quality.  
127 Thus, in this pressure range, we assigned the initial and final state as icositetramer  
128 and dimer. Ultimately, we found that the data were best represented by models  
129 comprised of icositetramer, dimer and an intermediate hexamer, octamer or  
130 dodecamer (Figure 1e). We acknowledge that there is no justification for selecting a  
131 specific intermediate state based on these data alone, and therefore refrain from doing  
132 so; the equivalence of the models and lack of cooperativity suggests that a range of  
133 intermediate states are present during dissociation. Although little work has been  
134 carried out on pressure-induced ferritin dissociation, there are many studies detailing  
135 pH and denaturant-induced dissociation and reassembly of mammalian ferritin<sup>33–38</sup>.  
136 The dissociation products and mechanisms of reassociation observed are consistent  
137 with the results obtained here, with dissociation to subunit dimer and reassociation *via*  
138 intermediate species including tetramers, hexamers and octamers most commonly  
139 reported.

140

141 To assess the effect of pressure on the internal structure, secondary structure and  
142 folding of ABfr, we used a combination of Kratky analysis and high pressure  
143 synchrotron radiation circular dichroism (CD). At low pressure, the Kratky plots for ABfr  
144 exhibit multiple peaks that converge to baseline indicative of a globular, spherical  
145 particle (Figure 1b). However, at pressures above 375 MPa, the Kratky plots  
146 demonstrate a transitioning of ABfr from a spherical particle to a partially folded  
147 structure. This may alter tertiary structure and interfacial interactions, destabilising the

148 icositetramer. We observed no significant change in the CD spectra between 0.1 MPa  
149 and experimental limit of this technique, 200 MPa (Figure 1f), and predicted structural  
150 composition *via* basis spectra remained constant (alpha helix = 0.99, beta sheet,  
151 0.01)<sup>39</sup>. The CD data support the SAXS data in this pressure range, and it is therefore  
152 likely that the observed changes in quaternary structure up to 375 MPa are due to the  
153 system shifting towards a lower volume state, rather than significant perturbation of  
154 the ABfr secondary structure<sup>40</sup>.

155

156 We then explored the reversibility of the pressure dissociation process. Initially, ABfr  
157 in 45 mM sodium phosphate (NaPi) buffer was pressurised to 450 MPa and held for 5  
158 minutes before pressure release (Figure 2a). An immediate depression in  $R_g$  was  
159 observed, and the hollow spherical structure was lost after 30 seconds. Fitting the  
160 change in icositetramer volume fraction against time with a single exponential function  
161 (Figure S6), the observed rate constant ( $k_{diss}$ ) of dissociation was determined to be  
162  $0.114 \pm 0.002 \text{ s}^{-1}$ . Almost complete reassembly occurred over 30 minutes following  
163 depressurisation, as apparent from the recovery of the radius of gyration over time  
164 (Figure 2a) and the hollow cage form of the  $P(r)$  function (Figure 2b). Again, fitting the  
165 change in icositetramer volume fraction against time with a single exponential function,  
166 the observed rate constant of reassociation ( $k_{ass}$ ), was determined to be  $0.006 \pm 0.001$   
167  $\text{s}^{-1}$  (Figure S6). Following reassociation, we noted that the final  $R_g$  and  $I(0)$  values were  
168 slightly lower than initial values (Figure 2a, b). To quantify the degree of reassociation  
169 and to control for possible radiation damage or background mismatch, a sample of  
170 ABfr in NaPi buffer (45 mM, pH 7) was pressurised under identical conditions without  
171 SAXS measurement. Analytical ultracentrifugation (AUC) before pressurisation  
172 (Figure 2c, Table S4) demonstrated that ABfr is fully assembled as the icositetramer

173 ( $S_{20, w} = 15.76$ , MW = 424 kDa). Following pressurisation ( $t = 60$  minutes), 94.3% of  
174 ABfr was assembled in the icositetramer state ( $S_{20, w} = 16.1$ , MW = 426 kDa), with the  
175 remaining material present as the subunit dimer ( $S_{20, w} = 3.53$ , MW = 44.5 kDa). TEM  
176 imaging confirmed the presence of assembled ABfr cages both before and after  
177 pressurisation, with no apparent change in morphology (Figure 2d, e).

178

179 The rate of reassociation under these conditions appears slow, and is significantly  
180 slower than the calculated dimer collisional frequency<sup>41</sup> ( $f_{25^{\circ}\text{C}} = 6.79 \times 10^5 \text{ S}^{-1}$  at  $25^{\circ}\text{C}$ )  
181 demonstrating unequivocally that reassembly is not diffusion limited. To test whether  
182 recovery from pressure induced conformational drift influenced the kinetics of  
183 reassociation<sup>42,43</sup>, we assessed the degree of protein denaturation by inspection of a  
184 normalised Kratky plot (Figure 2f), in which globular protein exhibits a maximum value  
185 of 1.104 for  $qR_g = \sqrt{3}$ , whilst unfolded protein has a maximum value of  $1.5 \cdot 2^{44}$ . This plot  
186 confirmed that the protein recovers almost immediately from the denatured state after  
187 pressure release, so the process is unlikely to be refolding-mediated.

188

189 The relatively slow rate of association may also be due to a kinetic barrier in the  
190 association process which could arise from repulsive interactions between subunit  
191 dimers. To determine the types of interaction dominant in this process, we explored  
192 the effect of ionic strength and temperature on the nanocage reassembly, finding  
193 strong correlation between these parameters and the rate and completeness of  
194 nanocage reassembly (Figure 3, Table S5). We observed the most efficient  
195 reassembly in high ionic strength sodium phosphate buffer (45 mM, 250 mM NaCl, pH  
196 7;  $I = 373 \text{ mM}$ ), with higher initial  $R_g$  than the low ionic strength buffers and almost  
197 complete reassembly at both 5 and 25 °C. In contrast, the assembly was notably



198 slower and less complete in lower ionic strength sodium phosphate buffer (pH 7, 45  
199 mM; I = 123 mM) at both temperatures, with only gradual recovery of  $R_g$  over the 1500  
200 seconds of measurement. Most notably, the reassembly process in water was  
201 significantly impaired at 25 °C, and was effectively arrested at 5 °C, with no  
202 discernable increase in  $R_g$  observed over 1500 seconds, indicating the presence of  
203 only discrete subunit dimers within this timeframe. Given these data, we propose that  
204 the reassembly of ABfr nanocages is likely driven by hydrophobic dispersion forces  
205 while opposed by coulombic repulsion.

206

207 Similar ionic strength dependencies on nanocage reassembly were observed for the  
208 naturally heme-free *E. coli* ferritin FtnA<sup>45</sup> following low pH-induced dissociation, and it  
209 is likely that the origin of this effect lies at the interface between ferritin subunit dimers,  
210 which associate to form the highly charged, carboxylate-rich ion channels at the C3  
211 and C4 interfaces<sup>46–48</sup>. The increased degree and rate of reassembly with temperature  
212 is a strong indication that assembly is entropically driven by the formation of weak  
213 protein-protein interactions<sup>49</sup>. For oligomeric assemblies, the enthalpic contribution  
214 ( $\Delta H$ ) is generally small, because the strength of protein-water and water-water  
215 interactions are similar. As such, increasing temperature decreases the Gibb's free  
216 energy of association ( $\Delta G^{\text{ass}}$ ) and favours assembly.

217

218 We also observed a greater degree of dissociation following pressurization at 5°C (5  
219 minutes at 450 MPa) at all ionic strengths tested here; previous studies of pressure-  
220 induced viral capsid dissociation have reported similar effects, and were attributed to  
221 a strong entropic contribution to the free energy of association<sup>50</sup>. In these cases,  
222 higher temperatures lower  $\Delta G^{\text{ass}}$ , promoting association in systems where entropic

223 contributions to the free energy dominate. Once the interfacial protein-protein  
224 interactions (principally salt bridges and dispersion interactions) are broken and the  
225 oligomers dissociate, dipole-dipole protein-water interactions are formed in their  
226 place<sup>50,51</sup>. At high pressure, inherently shorter dipole interactions are favoured over  
227 dispersion interactions due to the differential effect of compression on bond strength,  
228 and dissociation occurs due to the increasing formation of protein-water interactions.  
229 In addition, the hydration of hydrophobic surfaces is more favourable at high pressure,  
230 as the ordered solvation shell is denser than the bulk solvent. Both similar and  
231 contrasting behaviours have been reported for viral capsids under pressure. Silva *et*  
232 *al.*<sup>52,53</sup> demonstrated that the 86-subunit bromegrass mosaic virus capsid undergoes  
233 a reversible partial dissociation into dimers upon application of pressure (10 %  
234 dissociation at 200 MPa). In contrast, the turnip yellow mosaic virus irreversibly  
235 decapsidates rather than dissociates under pressure, resulting loss of RNA and  
236 formation of a holed capsid, as the subunit interface contains few pressure sensitive  
237 salt bridge and is rich in pressure insensitive hydrogen bonding interactions<sup>54</sup>.

238

239 We subsequently investigated the ability of the native heme B prosthetic group to  
240 modulate cage stability. Using a well-established procedure for tetrapyrrole extraction,  
241 we removed heme B using an acidified water:2-butanone mixture and confirmed the  
242 successful removal by UV/visible spectroscopy (Figure 4a)<sup>55</sup>. We next explored the  
243 composition of oligomeric species in this apo-apo-Bfr (AABfr) by sedimentation  
244 velocity analytical ultracentrifugation (SV-AUC, Figure 4b). In contrast to the heme  
245 containing ABfr, the SV-AUC distribution reveals a mixture of assembled icositetramer  
246 ( $S_{(20, w)} = 15.85$ , MW = 427.1 kDa, 62.1%) and subunit dimer ( $S_{(20, w)} = 2.97$ , MW =  
247 34.7 kDa, 37.9%). The icositetramer peak is broadened, indicating greater

248 polydispersity and potentially incomplete assembly. We further characterized this  
249 mixture of species by high-performance liquid chromatography-SAXS (HPLC-SAXS)  
250 (Figure 4c), and observed scattering patterns consistent with both the assembled  
251 icositetrameric nanocage ( $R_g = 49.88 \text{ \AA}$ ), and a smaller ellipsoidal or parallelepipedal  
252 particle<sup>56</sup>. The extrapolated  $R_g$  (22.21  $\text{\AA}$ ) of the smaller particle is in good agreement  
253 with that calculated for the subunit dimer (PDBID: 2VXI,  $R_g = 21.16 \text{ \AA}$ )<sup>57</sup>, and the Kratky  
254 plot (Figure 4d) indicates a compact structure, although with a greater degree of  
255 disorder than the AABfr icositetramer. We used bead modelling to analyse the SAXS  
256 data for both the ABfr and AABfr icositetramers and found excellent agreement  
257 between the hollow spherical models and the published Bfr crystal structure (Figure  
258 4e)<sup>57</sup>. Similarly, the bead model of the AABfr subunit dimer closely overlays with the  
259 crystal structure of the AABfr dimer (PDBID: 4CVP)<sup>58</sup>. To further probe the effects of  
260 removing heme B from the nanocages, we used circular dichroism spectroscopy to  
261 determine the thermal stabilities of the Bfr samples. We found the denaturation  
262 midpoints of ABfr ( $T_m = 68^\circ\text{C}$ ) and AABfr ( $T_m = 58^\circ\text{C}$ ) in agreement with previously  
263 reported values<sup>59,60</sup>, confirming that removal of heme B has an overall destabilizing  
264 effect on the protein. Comparison of the ABfr and AABfr subunit dimer crystal  
265 structures reveals slight secondary and tertiary structure differences that may impact  
266 the ability of the dimer to assemble into the icositetramer (Figure S7). In particular, the  
267 position of the E helix is shifted in the heme free protein; this helix lies at the  
268 tetramerization interface and is essential for cage assembly (Figure S8)<sup>61</sup>.

269

270 These data indicate that the binding of heme B not only leads to an increase in thermal  
271 stability of the bulk Bfr protein, but it specifically stabilises the nanocage assembly.  
272 While such increases in thermal stability induced through cofactor binding in heme-

273 proteins are widely reported, the bound cofactor's impact on cage stability and  
274 assembly is unknown<sup>62</sup>. To determine the effect of heme B on the pressure stability of  
275 Bfr, we pressurised AABfr to 450 MPa in 25 MPa increments, allowing time at each  
276 step for equilibration before SAXS measurement (Figure 5a). We found the real space  
277 distribution for ABfr at ambient pressure is representative of a mixture of assembled  
278 icositetramers and smaller subunit oligomers, in good agreement with the SV-AUC  
279 data described above (Figure 5b). The icositetramer nanocage structure visible in the  
280 real space distribution is rapidly lost with applied pressure, whilst the final state  
281 resembles a mixture of the subunit dimer and other lower order oligomers. The Kratky  
282 plots demonstrate a less globular structure than ABfr at similar pressures, and do not  
283 reveal any further unfolding over the pressure range (Figure 5c). The initial  $R_g$  for  
284 AABfr (42 Å) is notably lower than that of ABfr (50 Å) due to the mixture of icositetramer  
285 and dimer at ambient pressure. The  $R_g$  remains constant until 175 MPa, then  
286 decreases, reaching a plateau at 350 MPa, demonstrating that AABfr is significantly  
287 less pressure stable than ABfr (Figure 5d). The final  $R_g$  of 35 Å, was higher than that  
288 of ABfr (32 Å), suggesting a dissociation endpoint with a different oligomeric state.  
289

## 290 **Conclusions**

291 We have demonstrated here that hydrostatic pressure is a valuable method to control  
292 and modulate the assembly, disassembly and oligomeric composition of the  
293 bacterioferritin nanocage. It is highly likely that this methodology can be extended to  
294 other protein nanocages, especially those stabilized primarily by hydrophobic  
295 interactions. Since the method we report here is also gentle, tunable and not limited  
296 to intrinsically metastable or mutationally compromised cages, more robust hybrid  
297 materials tolerant of harsh environmental conditions are potentially accessible. Full  
298 cage dissociation might also provide a route to higher loading ratios of therapeutic  
299 molecules or larger payloads unable to traverse the protein cage, leading, for example,  
300 to significantly improved synthetic routes to nanocage-based drug delivery vehicles.

301

302 Furthermore, we have also demonstrated that the heme B prosthetic groups  
303 significantly enhance the Bfr nanocage stability. While it has been previously reported  
304 that heme B facilitates electron transfer and iron release from the Bfr core, this can  
305 occur in the absence of the prosthetic group and it is notable that heme B is absent in  
306 many/most of the known ferritins. It therefore seems plausible that an additional major  
307 role of heme B in Bfr is to stabilise the protein nanocage, thus enabling the retention  
308 of the protein superstructure for iron mineralisation.

309

## 310 **Methods**

### 311 **Protein expression and purification**

312 Bacterioferritin expression was carried out in T7 express *E. coli* BL21 (DE3) cells using  
313 a modified pUC119 plasmid, PGS281 as described in Andrews *et al*<sup>63</sup>. Cultures were  
314 grown aerobically at 37 °C in LB media containing 34 µg mL<sup>-1</sup> carbenicillin. Flasks  
315 were shaken for 24 hours at 200 rpm, before cultures were harvested by centrifugation  
316 (10 minutes, 7277 xg rcf). The pellets were washed then re-suspended in lysis buffer  
317 (1.5 mM KH<sub>2</sub>PO<sub>4</sub>, 8 mM Na<sub>2</sub>HPO<sub>4</sub>, 150 mM NaCl, 3 mM KCl, pH 7).  
318 Phenylmethylsulfonyl fluoride (PMSF) (1 mM) was added, and then cells were lysed  
319 using a probe sonicator (3 × 20s, maximum amplitude). The crude extract was then  
320 centrifuged (47808 xg, 60 minutes). The supernatant was decanted, heated to 70 °C  
321 for 15 minutes, then cooled and centrifuged (47808 xg, 30 minutes). The supernatant  
322 was concentrated using a centrifugal concentrator (MWCO = 50 kDa) to half the  
323 original volume. The extract was purified by size exclusion chromatography using a  
324 Sephadex S200 26/600 column equilibrated with lysis buffer at a flow rate of 2.3 mL  
325 *per* minute. Bfr containing fractions were pooled, concentrated, and then further  
326 purified by anion exchange chromatography using a Q-Sepharose FF column. The  
327 target protein was eluted with a linear gradient of 0-0.3 M NaCl in histidine buffer (20  
328 mM histidine.HCl, pH 5.5). The purified protein was dialysed in a solution of EDTA (10  
329 mM) and DTT (5 mM) to remove the native core, forming ABfr.

330

### 331 **High pressure SAXS measurement**

332 Data collection was carried out at the I22 beamline, Diamond Light Source (DLS,  
333 Harwell, UK), using a hydrostatic pressure cell with a maximum operation pressure of  
334 500 MPa<sup>28</sup>. Samples were loaded into thin-wall polycarbonate capillaries ( $\theta=2$  mm),

335 which were then sealed with a rubber bung and two-part adhesive. The beam energy  
336 was 18 keV ( $\lambda = 0.69 \text{ \AA}$ ) to reduce absorption from the diamond windows and water in  
337 the beam path. ABfr samples were prepared at a concentration of  $5 \text{ mg mL}^{-1}$  in a range  
338 of buffers and centrifuged (10 minutes,  $16000 \times g$ ) prior to measurement. The collection  
339 time for individual measurements was between 6 and 60 s. Hydrostatic pressure  
340 experiments were performed under both equilibrium and dynamic, time resolved  
341 conditions. In the former, the pressure was raised in incremental steps allowing time  
342 for equilibrium before measurement. The beam was blocked during equilibration to  
343 prevent radiation damage. In dynamic experiments the sample was pressurised, held  
344 at pressure, then returned to ambient pressure whilst measuring the time resolved  
345 scattering pattern. Pressure jump experiments were conducted in which pressure was  
346 increased rapidly to 450 MPa whilst measuring the time resolved scattering. The data  
347 were collected using a Pilatus P3-2M detector. The sample to detector distance was  
348 6 m, providing a  $q$ -range of  $0.008\text{-}0.52 \text{ \AA}^{-1}$ . The two-dimensional data sets were  
349 reduced using DAWN<sup>64</sup>. Briefly, the  $q$ -axis was calibrated using with a silver behenate  
350 standard data, then detector images were masked, radially averaged from the beam  
351 centre and normalised to absolute intensity using a glassy carbon standard.  
352 Background subtraction was carried out using a user-written python script (Figure S9  
353 and S10) to account for background mismatch in the high- $q$  data region. This  
354 mismatch resulted from the necessity of using different capillaries for sample and  
355 background, and slight changes in cell and capillary position when changing samples.  
356 Whilst this mismatch was generally low, systemic under-subtraction at low pressure  
357 and over-subtraction at high pressure was present across data sets. The background  
358 measurement was multiplied by a constant to align the high- $q$  region with that of the  
359 sample. The median  $I(q)$  of the region  $q = 0.3\text{-}0.4 \text{ \AA}^{-1}$  was determined for both sample

360 and background data. The background was then multiplied by a constant,  $k$ , such that  
361 the corrected median  $I(q)$  of the background was equal to the median  $I(q)$  of the sample  
362 minus a small constant,  $A$ . The scaling constant was therefore:

363

364 
$$k = \frac{I(q)_{sample} - A}{I(q)_{background}} \quad q = 0.3 - 0.4 \text{ \AA}^{-1}$$

365 This method was effective in background matching the high- $q$  data region and  
366 preventing over and under subtraction with  $k = 1 \times 10^{-5}$ . Example data corrections for  
367 ABfr at 0.1 MPa and 200 MPa are shown in Figure S9. The background adjustment  
368 results in lower overall  $I(q)$  relative to the unprocessed data, but the shape of the  
369 scattering curve is preserved. Artefacts resulting from Kossel lines are visible in the  
370 data at 200 MPa at  $q = 0.016$  and  $0.7 \text{ \AA}^{-1}$  despite background subtraction. The effect  
371 is most visible in the 2D detector image, shown in Figure S10. Kossel lines are  
372 observed between 100-300 MPa in both background and sample images. The  
373 intensity of the effect is pressure dependent, and line position is dependent on the  
374 orientation of the diamond windows. Care was taken to repeat background  
375 measurements following window changes. However, mismatched line intensity  
376 between sample and background resulted in artefacts in the reduced data. The  
377 mismatch occurs due to the pressure dependence of line intensity: whilst pressure  
378 control is accurate to 0.1 MPa in this apparatus, slight pressure loss often occurs  
379 during measurement due to leakage. Consequently, pressure differences between  
380 samples and background measurements of up to 0.3 MPa are observed. Although  
381 visible in the data, the artefacts are small and not expected to affect subsequent fitting  
382 and data analysis. Parasitic scattering is present in some data sets, particularly where  
383 Kossel lines intersect with the beam-stop (Figure S10 (200 MPa)). This effect is not



384 effectively removed by background subtraction, and manifests as aggregation-like  
385 scattering at  $q < 0.04 \text{ \AA}^{-1}$ , which precludes the use of Guinier methods for the  
386 approximation of  $I(0)$  and  $R_g$ , but does not affect the determination of these parameters  
387 from the indirect Fourier transform of the data.

388

### 389 **High pressure liquid chromatography small angle X-ray scattering**

390 HPLC-SAXS measurements were carried out using the B21 beamline at the Diamond  
391 Light Source, Harwell, UK. Measurements were taken with a camera length of 3.9 m  
392 and a beam energy of 12.4 keV. The beam cross section was 1 x 5 mm. The scattering  
393 angle and absolute intensity were pre-calibrated using silver behenate and glassy  
394 carbon standards. Samples were measured in a glass capillary at a concentration of  
395 2-5 mg mL<sup>-1</sup> and a temperature of 25°C. Data were collected in 30 successive frames  
396 of one second each. Inline HPLC separation was carried out using a Shodex KW 403  
397 column. The 2D SAXS patterns obtained were radially averaged from the beam centre,  
398 normalised to an absolute intensity scale using a glassy carbon standard and  
399 corrected for background scattering from buffer components. ScÅtter was used to  
400 determine basic SAXS invariants and determine the pair distance distribution ( $P(r)$ )  
401 functions from the experimental data as described previously<sup>65,66</sup>. Ab initio modelling  
402 was carried out using DAMMIF and DAMAVER with no symmetry restrictions<sup>67</sup>. The  
403 crystallographic model of *E. coli* bacterioferritin was obtained from the Protein Data  
404 Bank (PDB code: 2VXI, 4CVP), and aligned to the reconstructed structural models  
405 using the program SUPALM<sup>68</sup>.

406

407

408

## 409 **Circular Dichroism**

410 Circular dichroism (CD) spectroscopy was used to determine the relative thermal  
411 stabilities of ABfr and AABfr and to investigate the secondary structure of both  
412 proteins. Solutions of ABfr or AABfr (0.5 g L<sup>-1</sup>) were prepared in 45 mM sodium  
413 phosphate buffer (pH 7). The far UV spectrum (190-260 nm) was measured at 25 °C,  
414 then the temperature was increased in 3 degree increments allowing for equilibration  
415 (300s) at each step. The helical content was measured by monitoring mean residue  
416 ellipticity at  $\lambda = 222$  nm. The thermal denaturation midpoint temperature was  
417 determined using sigmoidal fits of the raw the  $[\theta_{222 \text{ nm}}]$  data and from the maxima in  
418 first differential of the  $[\theta_{222 \text{ nm}}]$  data (Figure 4f). Secondary structure composition was  
419 determined by linear combination of basis spectra using CAPITO<sup>39</sup>.

420

## 421 **High pressure circular dichroism**

422 High pressure circular dichroism measurements were carried out at the B23 beamline,  
423 Diamond Light Source (DLS, Harwell, UK), using a hydrostatic pressure cell with a  
424 maximum operation pressure of 200 MPa<sup>69</sup>. Results obtained were processed using  
425 CDApps and OriginLab. Secondary structure estimation from CD spectra was carried  
426 out using the CAPITO CD analysis and plotting tool<sup>39</sup>.

427

## 428 **Sedimentation velocity analytical ultracentrifugation**

429 Sedimentation velocity was measured in sodium phosphate buffer (45 mM NaPi, 250  
430 mM NaCl, pH 7) using a Beckmann ProteomeLab XL-I at 20 ° C and 24000 rpm. Data  
431 were collected at a wavelength of 418 nm. Date file time stamps were corrected using  
432 REDATE, and continuous sedimentation velocity coefficient (c(S)) distributions were  
433 produced using SEDFIT. Buffer density and viscosity were measured using an Anton-

434 Paar rolling ball viscometer. The protein partial specific volume was calculated from  
435 the primary sequence ( $\bar{v} = 0.736 \text{ cm}^3 \text{ g}^{-1}$ ).

436

#### 437 **Transmission electron microscopy**

438 All transmission electron microscopy data were collected by using a JEOL 1200 MK2  
439 TEM at the University of Bristol. Bfr samples were deposited onto carbon film coated  
440 copper mesh grids and stained using phosphotungstic acid, which is not internalised  
441 by the protein cage.

442

#### 443 **PISA analysis of ABfr**

444 A bioinformatics approach was adopted in order to identify potential dissociation states  
445 of ABfr under pressure. The Proteins, Interfaces, Structures and Assemblies (PISA)  
446 tool was used to calculate overall solvent accessible surface areas, solvation free  
447 energies ( $\Delta G^{\text{int}}$ ) and dissociation free energies ( $\Delta G^{\text{diss}}$ ) for stable subunit oligomers of  
448 ABfr<sup>32,70,71</sup>. The PISA analysis identifies thermodynamically stable assemblies of  
449 subunits based on interfacial interactions. For ABfr, only the fully assembled  
450 icositetramer and dimer were identified as stable quaternary structures in solution. The  
451 surface areas and free energies of these species are shown in Table S1. The free  
452 energy of dissociation,  $\Delta G^{\text{diss}}$ , corresponds to the free energy difference between  
453 associated and dissociated states. A positive value indicates that the assembled state  
454 is stable under standard conditions.

455

#### 456 **SVD analysis and oligomer model fitting of ABfr pressure dissociation.**

457 SVDPLOT and Ultrascan II were used to produce a set of basis eigenvectors and  
458 eigenvalues for the ABfr dataset (Figure S1)<sup>31,72</sup>. A non-parameterised runs test was

459 used to identify non-random curves in the eigenvector set<sup>73</sup>. Eigenvectors with  $p <$   
460 0.05 were deemed to be non-random, yielding 12 significant eigenvectors. Inspection  
461 of the ABfr eigenvectors revealed that those with the highest three eigenvalues are  
462 smooth curves reminiscent of scattering form factors, and so are likely to contain  
463 structural information corresponding to the initial icositetramer and oligomeric  
464 dissociation products. The subsequent curves are structured, but contain significant  
465 noise, and may contain contributions from minor species as well as background  
466 components due to path length variation and imperfect background subtraction. The  
467 data were then reconstructed incrementally by adding eigenvectors to the model in  
468 order of decreasing significance. The root mean squared deviation between the  
469 reconstructed datasets and the experimental curves was calculated at each stage  
470 (Figure S2).

471

472 Subunit oligomer models were extracted from the crystal structure of the full ABfr  
473 icositetramer (2VXI), and theoretical scattering data from these models was calculated  
474 using CRY SOL (Figures S3 and S4)<sup>30</sup>. OLIGOMER was then used to fit linear  
475 combinations of these oligomers to the experimental dataset<sup>31</sup>. Fit quality was  
476 assessed by the reduced chi-squared value and by inspection of fit residuals (Figure  
477 S5 and Table S3).

478

479

## 480 **Acknowledgements**

481 This work was supported at the University of Bristol by the Bristol Centre for Functional  
482 Nanomaterials (EPSRC Doctoral Training Centre Grant EP/G036780/1) through a  
483 studentship for K.L.V. We acknowledge Diamond Light Source for time on I22 under  
484 proposals SM8237, SM9367, and SM11615, for time on B21 under proposals  
485 SM10054, SM1318 and SM16020, and for time on B23 under proposal SM14069.

486

## 487 **Author Contributions**

488 J.L.R.A and A.W.P conceived the project; K.L.V., D.W., B.C., D.T., V.T., and  
489 A.J.S. performed the experiments; K.L.V., B.C., H.C., R.R., A.J.S., J.L.R.A.  
490 and A.W.P. discussed the results; K.L.V. and J.L.R.A. wrote the manuscript.

491

## 492 **Supporting Information**

493 PISA analysis, detailed AUC data, structural models and additional SAXS data  
494 including single value decomposition, calculated  $P(r)$  distributions, OLIGOMER  
495 models, ABfr dissociation data and background subtraction examples are provided in  
496 the supporting information.

## 497 **References**

- 498 1. Bhaskar, S. & Lim, S. Engineering protein nanocages as carriers for biomedical  
499 applications. *NPG Asia Materials* **9**, e371–e371 (2017).
- 500 2. Kanekiyo, M. *et al.* Self-assembling influenza nanoparticle vaccines elicit  
501 broadly neutralizing H1N1 antibodies. *Nature* **499**, 102–106 (2013).
- 502 3. Ren, H., Zhu, S. & Zheng, G. Nanoreactor design based on self-assembling  
503 protein nanocages. *Int. J. Mol. Sci.* **20**, (2019).
- 504 4. Maity, B., Fujita, K. & Ueno, T. Use of the confined spaces of apo-ferritin and  
505 virus capsids as nanoreactors for catalytic reactions. *Curr. Opin. Chem. Biol.* **25**,  
506 88–97 (2015).
- 507 5. Douglas, T. & Stark, V. T. Nanophase cobalt oxyhydroxide mineral synthesized  
508 within the protein cage of ferritin. *Inorg. Chem.* **39**, 1828–1830 (2000).
- 509 6. Yamashita, I., Hayashi, J. & Hara, M. Bio-template Synthesis of Uniform CdSe  
510 Nanoparticles Using Cage-shaped Protein, Apoferritin. *Chem. Lett.* **33**, 1158–  
511 1159 (2004).
- 512 7. Ueno, T. *et al.* Size-selective olefin hydrogenation by a Pd nanocluster provided  
513 in an apo-ferritin cage. *Angew. Chemie - Int. Ed.* **43**, 2527–2530 (2004).
- 514 8. Douglas, T. *et al.* Protein engineering of a viral cage for constrained  
515 nanomaterials synthesis. *Adv. Mater.* **14**, 415–418 (2002).
- 516 9. He, D. & Marles-Wright, J. Ferritin family proteins and their use in  
517 bionanotechnology. *N. Biotechnol.* **32**, 651–657 (2015).
- 518 10. Jutz, G., Van Rijn, P., Santos Miranda, B. & Böker, A. Ferritin: A versatile  
519 building block for bionanotechnology. *Chem. Rev.* **115**, 1653–1701 (2015).
- 520 11. Putri, R. M. *et al.* Structural Characterization of Native and Modified Encapsulins  
521 as Nanoplatfoms for in Vitro Catalysis and Cellular Uptake. *ACS Nano* **11**,

- 522 12796–12804 (2017).
- 523 12. Choi, S. H., Kwon, I. C., Hwang, K. Y., Kim, I. S. & Ahn, H. J. Small heat shock  
524 protein as a multifunctional scaffold: Integrated tumor targeting and caspase  
525 imaging within a single cage. *Biomacromolecules* **12**, 3099–3106 (2011).
- 526 13. Azuma, Y., Edwardson, T. G. W. & Hilvert, D. Tailoring lumazine synthase  
527 assemblies for bionanotechnology. *Chemical Society Reviews* **47**, 3543–3557  
528 (2018).
- 529 14. Butterfield, G. L. *et al.* Evolution of a designed protein assembly encapsulating  
530 its own RNA genome. *Nature* **552**, 415–420 (2017).
- 531 15. Malay, A. D. *et al.* An ultra-stable gold-coordinated protein cage displaying  
532 reversible assembly. *Nature* **569**, 438–442 (2019).
- 533 16. Swift, J., Butts, C. A., Cheung-Lau, J., Yerubandi, V. & Dmochowski, I. J.  
534 Efficient Self-Assembly of *Archaeoglobus fulgidus* ferritin around metallic cores.  
535 *Langmuir* **25**, 5219–5225 (2009).
- 536 17. Sana, B., Johnson, E. & Lim, S. The unique self-assembly/disassembly property  
537 of *Archaeoglobus fulgidus* ferritin and its implications on molecular release from  
538 the protein cage. *Biochim. Biophys. Acta - Gen. Subj.* **1850**, 2544–2551 (2015).
- 539 18. Nasrollahi, F. *et al.* Incorporation of Graphene Quantum Dots, Iron, and  
540 Doxorubicin in/on Ferritin Nanocages for Bimodal Imaging and Drug Delivery.  
541 *Adv. Ther.* **3**, 1900183 (2020).
- 542 19. Fletcher, J. M. *et al.* Self-assembling cages from coiled-coil peptide modules.  
543 *Science (80-. )*. **340**, 595–599 (2013).
- 544 20. Peng, T. & Lim, S. Trimer-based design of pH-responsive protein cage results  
545 in soluble disassembled structures. *Biomacromolecules* **12**, 3131–3138 (2011).
- 546 21. Dalmau, M., Lim, S. & Wang, S. W. Design of a pH-dependent molecular switch

- 547 in a caged protein platform. *Nano Lett.* **9**, 160–166 (2009).
- 548 22. Pontillo, N., Pane, F., Messori, L., Amoresano, A. & Merlino, A. Cisplatin  
549 encapsulation within a ferritin nanocage: A high-resolution crystallographic  
550 study. *Chem. Commun.* **52**, 4136–4139 (2016).
- 551 23. Liu, X. *et al.* Apoferritin-CeO<sub>2</sub> nano-truffle that has excellent artificial redox  
552 enzyme activity. *Chem. Commun.* **48**, 3155–3157 (2012).
- 553 24. Skouri-Panet, F., Quevillon-Cheruel, S., Michiel, M., Tardieu, A. & Finet, S.  
554 sHSPs under temperature and pressure: The opposite behaviour of lens alpha-  
555 crystallins and yeast HSP26. *Biochim. Biophys. Acta - Proteins Proteomics*  
556 **1764**, 372–383 (2006).
- 557 25. White, H. E. *et al.* Multiple Distinct Assemblies Reveal Conformational Flexibility  
558 in the Small Heat Shock Protein Hsp26. *Structure* **14**, 1197–1204 (2006).
- 559 26. Zhang, T. *et al.* Effect of high hydrostatic pressure (HHP) on structure and  
560 activity of phytoferritin. *Food Chem.* **130**, 273–278 (2012).
- 561 27. Wang, Q. *et al.* High hydrostatic pressure encapsulation of doxorubicin in ferritin  
562 nanocages with enhanced efficiency. *J. Biotechnol.* **254**, 34–42 (2017).
- 563 28. Brooks, N. J. *et al.* Automated high pressure cell for pressure jump x-ray  
564 diffraction. *Rev. Sci. Instrum.* **81**, 064103 (2010).
- 565 29. Tanner, J. J. Empirical power laws for the radii of gyration of protein oligomers.  
566 *Acta Crystallogr. Sect. D Struct. Biol.* **72**, 1119–1129 (2016).
- 567 30. Svergun, D., Barberato, C. & Koch, M. H. CRY SOL - A program to evaluate X-  
568 ray solution scattering of biological macromolecules from atomic coordinates. *J.*  
569 *Appl. Crystallogr.* **28**, 768–773 (1995).
- 570 31. Konarev, P. V., Volkov, V. V., Sokolova, A. V., Koch, M. H. J. & Svergun, D. I.  
571 PRIMUS: A Windows PC-based system for small-angle scattering data analysis.



- 572 *J. Appl. Crystallogr.* **36**, 1277–1282 (2003).
- 573 32. Krissinel, E. & Henrick, K. Inference of Macromolecular Assemblies from  
574 Crystalline State. *J. Mol. Biol.* **372**, 774–797 (2007).
- 575 33. Stefanini, S., Vecchini, P. & Chiancone, E. On the Mechanism of Horse Spleen  
576 Apoferritin Assembly: A Sedimentation Velocity and Circular Dichroism Study.  
577 *Biochemistry* **26**, 1831–1837 (1987).
- 578 34. Gerl, M. & Jaenicke, R. Mechanism of the self-assembly of apoferritin from horse  
579 spleen - Cross-linking and spectroscopic analysis. *Eur. Biophys. J.* **15**, 103–109  
580 (1987).
- 581 35. Banyard, S. H., Stammers, D. K. & Harrison, P. M. Electron density map of  
582 apoferritin at 2.8-Å resolution. *Nature* **271**, 282–284 (1978).
- 583 36. Sato, D. *et al.* Ferritin Assembly Revisited: A Time-Resolved Small-Angle X-ray  
584 Scattering Study. *Biochemistry* **55**, 287–293 (2016).
- 585 37. Kilic, M. a, Spiro, S. & Moore, G. R. Stability of a 24-meric homopolymer:  
586 comparative studies of assembly-defective mutants of *Rhodobacter capsulatus*  
587 bacterioferritin and the native protein. *Protein Sci.* **12**, 1663–1674 (2003).
- 588 38. Andrews, S. C. *et al.* Physical, chemical and immunological properties of the  
589 bacterioferritins of *Escherichia coli*, *Pseudomonas aeruginosa* and *Azotobacter*  
590 *vinelandii*. *Biochim. Biophys. Acta - Protein Struct. Mol. Enzymol.* **1078**, 111–  
591 116 (1991).
- 592 39. Wiedemann, C., Bellstedt, P. & Görlach, M. CAPITO - A web server-based  
593 analysis and plotting tool for circular dichroism data. *Bioinformatics* **29**, 1750–  
594 1757 (2013).
- 595 40. Weber, G. Thermodynamics of the association and the pressure dissociation of  
596 oligomeric proteins. *J. Phys. Chem.* **97**, 7108–7115 (1993).

- 597 41. Atkins, P. & de, P. J. Atkins' Physical Chemistry, 7th Edition. *Oxford Univ. Press*  
598 (2002).
- 599 42. Ward, A. B., Sali, A. & Wilson, I. A. Integrative Structural Biology. *Science (80-*  
600 *)*. **339**, 913–915 (2013).
- 601 43. Brooks-Bartlett, J. C. *et al.* Development of tools to automate quantitative  
602 analysis of radiation damage in SAXS experiments. *J. Synchrotron Radiat.* **24**,  
603 63–72 (2017).
- 604 44. Kikhney, A. G. & Svergun, D. I. A practical guide to small angle X-ray scattering  
605 (SAXS) of flexible and intrinsically disordered proteins. *FEBS Lett.* **589**, 2570–  
606 2577 (2015).
- 607 45. Sato, D. *et al.* Electrostatic Repulsion during Ferritin Assembly and Its Screening  
608 by Ions. *Biochemistry* **55**, 482–488 (2016).
- 609 46. Watt, R. K., Hilton, R. J. & Graff, D. M. Oxido-reduction is not the only  
610 mechanism allowing ions to traverse the ferritin protein shell. *Biochimica et*  
611 *Biophysica Acta - General Subjects* **1800**, 745–759 (2010).
- 612 47. Bakker, G. R. & Boyer, R. F. Iron incorporation into apoferritin. The role of  
613 apoferritin as a ferroxidase. *J. Biol. Chem.* **261**, 13182–13185 (1986).
- 614 48. Rui, H., Rivera, M. & Im, W. Protein dynamics and ion traffic in bacterioferritin.  
615 *Biochemistry* **51**, 9900–9910 (2012).
- 616 49. Kegel, W. K. & van der Schoot, P. Competing Hydrophobic and Screened-  
617 Coulomb Interactions in Hepatitis B Virus Capsid Assembly. *Biophys. J.* **86**,  
618 3905–3913 (2004).
- 619 50. Silva, J. Pressure Stability of Proteins. *Annu. Rev. Phys. Chem.* **44**, 89–113  
620 (1993).
- 621 51. Silva, J. L., Foguel, D. & Royer, C. A. Pressure provides new insights into protein

- 622 folding, dynamics and structure. *Trends Biochem. Sci.* **26**, 612–618 (2001).
- 623 52. Silva, J. L. & Weber, G. Pressure-induced dissociation of brome mosaic virus.  
624 *J. Mol. Biol.* **199**, 149–159 (1988).
- 625 53. Leimkühler, M., Goldbeck, A., Lechner, M. D. & Witz, J. Conformational changes  
626 preceding decapsidation of bromegrass mosaic virus under hydrostatic  
627 pressure: A small-angle neutron scattering study. *J. Mol. Biol.* **296**, 1295–1305  
628 (2000).
- 629 54. Leimkühler, M. *et al.* The formation of empty shells upon pressure induced  
630 decapsidation of turnip yellow mosaic virus. *Arch. Virol.* **146**, 653–667 (2001).
- 631 55. Teale, F. W. J. Cleavage of the haem-protein link by acid methylethylketone.  
632 *BBA - Biochim. Biophys. Acta* **35**, 543 (1959).
- 633 56. Nayuk, R. & Klaus, H. Formfactors of Hollow and Massive Rectangular  
634 Parallelepipeds at Variable Degree of Anisometry. *Zeitschrift für Physikalische  
635 Chemie* **226**, 837 (2012).
- 636 57. Willies, S. C., Isupov, M. N., Garman, E. F. & Littlechild, J. A. The binding of  
637 haem and zinc in the 1.9 Å X-ray structure of Escherichia coli bacterioferritin. *J.  
638 Biol. Inorg. Chem.* **14**, 201–207 (2009).
- 639 58. Hingorani, K. *et al.* Photo-oxidation of tyrosine in a bio-engineered  
640 bacterioferritin ‘reaction centre’ - A protein model for artificial photosynthesis.  
641 *Biochim. Biophys. Acta - Bioenerg.* **1837**, 1821–1834 (2014).
- 642 59. Ardejani, M. S., Li, N. X. & Orner, B. P. Stabilization of a protein nanocage  
643 through the plugging of a protein-protein interfacial water pocket. *Biochemistry*  
644 **50**, 4029–4037 (2011).
- 645 60. Wong, S. G. *et al.* Structural and mechanistic studies of a stabilized subunit  
646 dimer variant of Escherichia coli bacterioferritin identify residues required for

- 647 core formation. *J. Biol. Chem.* **284**, 18873–18881 (2009).
- 648 61. Fan, R., Boyle, A. L., Vee, V. C., See, L. N. & Orner, B. P. A helix swapping  
649 study of two protein cages. *Biochemistry* **48**, 5623–5630 (2009).
- 650 62. Hargrove, M. S. *et al.* Stability of Myoglobin: A Model for the Folding of Heme  
651 Proteins. *Biochemistry* **33**, 11767–11775 (1994).
- 652 63. Andrews, S. C. *et al.* Overproduction, purification and characterization of the  
653 bacterioferritin of *Escherichia coli* and a C-terminally extended variant. *Eur. J.*  
654 *Biochem.* **213**, 329–338 (1993).
- 655 64. Basham, M. *et al.* Data Analysis Workbench (DAWN). *J. Synchrotron Radiat.*  
656 **22**, 853–858 (2015).
- 657 65. Rambo, R. P. & Tainer, J. A. Accurate assessment of mass, models and  
658 resolution by small-angle scattering. *Nature* **496**, 477–481 (2013).
- 659 66. Rambo, R. P. & Tainer, J. A. Characterizing flexible and intrinsically unstructured  
660 biological macromolecules by SAS using the Porod-Debye law. *Biopolymers* **95**,  
661 559–571 (2011).
- 662 67. Franke, D. & Svergun, D. I. DAMMIF, a program for rapid ab-initio shape  
663 determination in small-angle scattering. *J. Appl. Crystallogr.* **42**, 342–346  
664 (2009).
- 665 68. Konarev, P. V., Petoukhov, M. V. & Svergun, D. I. Rapid automated  
666 superposition of shapes and macromolecular models using spherical  
667 harmonics. *J. Appl. Crystallogr.* **49**, 953–960 (2016).
- 668 69. Hussain, R., Jávorfí, T. & Siligardi, G. Circular dichroism beamline B23 at the  
669 Diamond Light Source. *J. Synchrotron Radiat.* **19**, 132–135 (2012).
- 670 70. De Val, N., Declercq, J. P., Lim, C. K. & Crichton, R. R. Structural analysis of  
671 haemin demetallation by L-chain apoferritins. *J. Inorg. Biochem.* **112**, 77–84

672 (2012).

673 71. Chen, C. R. & Makhatadze, G. I. ProteinVolume: calculating molecular van der  
674 Waals and void volumes in proteins. *BMC Bioinformatics* **16**, 101 (2015).

675 72. Demeler, B. *et al.* Characterization of size, anisotropy, and density heterogeneity  
676 of nanoparticles by sedimentation velocity. *Anal. Chem.* **86**, 7688–7695 (2014).

677 73. Wald, A. & Wolfowitz, J. On a Test Whether Two Samples are from the Same  
678 Population. *Ann. Math. Stat.* **11**, 147–162 (1940).

679 74. Hansen, S. BayesApp: A web site for indirect transformation of small-angle  
680 scattering data. *J. Appl. Crystallogr.* **45**, 566–567 (2012).

681

682

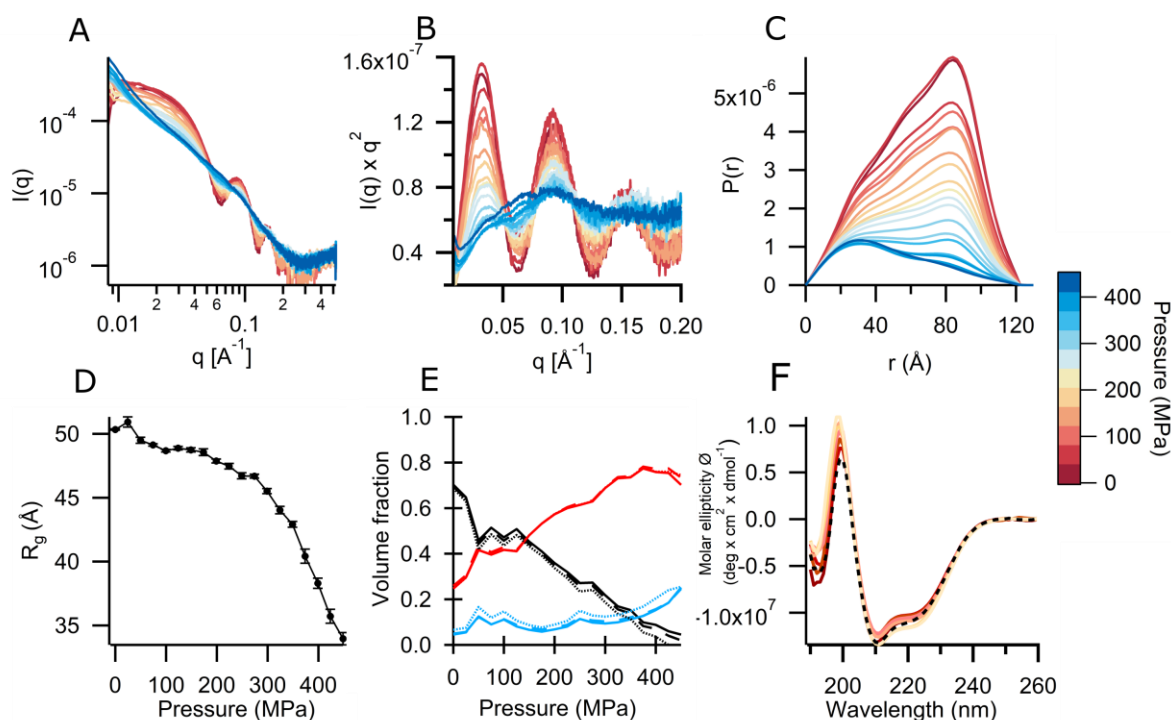

683  
684 **Figure 1. Pressure dissociation of ABfr under equilibrium conditions between 0.1 and 450 MPa**  
685 **measured using high pressure synchrotron radiation SAXS and circular dichroism. (A)**  
686 **Reciprocal space SAXS profiles, (B) Kratky plots, (C) pair distance distribution (P(r)) functions, (D)**  
687 **change in radius of gyration,  $R_g$ , with pressure, (E) change in solution oligomer composition with**  
688 **pressure and (F) circular dichroism spectra. SAXS data were collected between 0.1 MP (red) and 450**  
689 **MPa (blue) at a protein concentration of 5 mg mL<sup>-1</sup> in 45 mM sodium phosphate buffer (pH 7). Real**  
690 **space transformations were performed using BAYESAPP, which uses Bayesian analysis to select**  
691 **parameters such as  $D_{max}$  and data noise level.<sup>74</sup>  $I(0)$  and  $R_g$  were calculated from real space data.  $I(0)$**   
692 **was normalised to a maximum value of 1. Component volume fraction versus pressure generated from**  
693 **OLIGOMER models of ABfr dissociation. The volume fractions of the icositetramer,  $n$ -mer and dimer**  
694 **are shown in black, blue and red respectively. The intermediate oligomer states are hexamer (solid**  
695 **line), octamer (dashed line) and dodecamer (dotted line). High-pressure circular dichroism data was**  
696 **collected between 0.1 (red) and 200 MPa (yellow) at a protein concentration of 0.03 mg mL<sup>-1</sup>, 45 mM**  
697 **sodium phosphate, pH 7.**

698  
699  
700  
701  
702  
703  
704  
705  
706  
707  
708  
709  
710  
711  
712

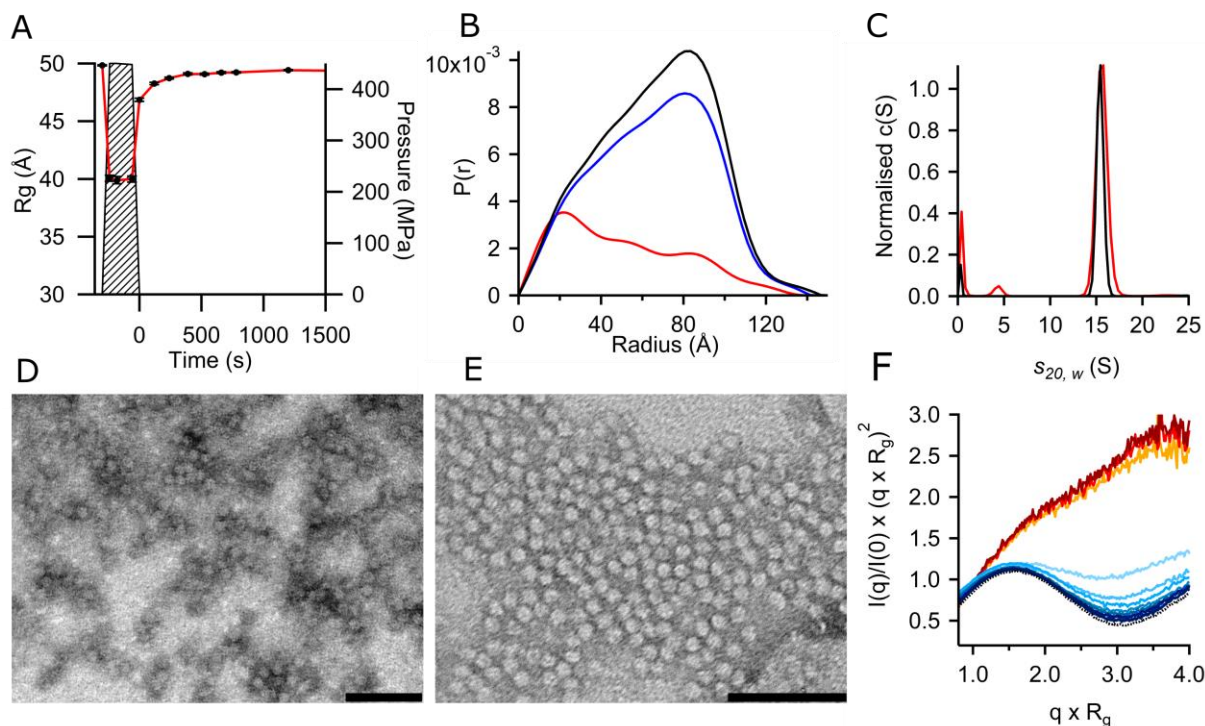

713  
 714 **Figure 2. Reassociation of ABfr following pressure induced dissociation measured by SAXS,**  
 715 **AUC and TEM. (A)** Changes in ABfr  $R_g$  pre, during and post- pressurization measured by SAXS.  
 716 Pressure cycle was performed at 25°C NaPi (45 mM, pH 7, I = 123 mM). **(B)** Pair distance distribution  
 717 ( $P(r)$ ) functions for ABfr pre- (black), during (red) and post- pressurisation (blue). **(C)** Sedimentation  
 718 velocity  $c(S)$  distribution for ABfr pre-pressurisation (black) and post-pressurisation (red). Sedimentation  
 719 velocity was measured at a protein concentration of approximately 50  $\mu\text{M}$  in sodium phosphate buffer  
 720 (45 mM NaPi, 250 mM NaCl, pH 7) using a Beckmann ProteomeLab XL-I at 20°C and 24000 rpm. Data  
 721 was collected at a wavelength of 418 nm. Data file time stamps were corrected using REDATE, and  
 722 continuous sedimentation coefficient ( $c(S)$ ) distributions were fitted using SEDFIT. Buffer density ( $\rho =$   
 723 1.003 g  $\text{cm}^{-3}$ ) and viscosity ( $\eta = 1.0107 \text{ mPa s}^{-1}$ ) were measured using an Anton-Paar rolling ball  
 724 viscometer. **(D)** Negative stain (phosphotungstic acid) TEM images of ABfr pre-pressurisation and **(E)**  
 725 and post-pressurisation (scale bars = 100 nm). **(F)** Change in normalised Kratky intensity  
 726 ( $I(q=1.1)/I(0) \times (q \times R_g)^2$ ) with pre, during and post- pressurization. Dotted black trace shows pre-  
 727 pressurisation data, yellow – red traces show pressurised data at 0, 120 and 300s, light blue – dark  
 728 blue traces show post pressurisation data with increasing time.  
 729

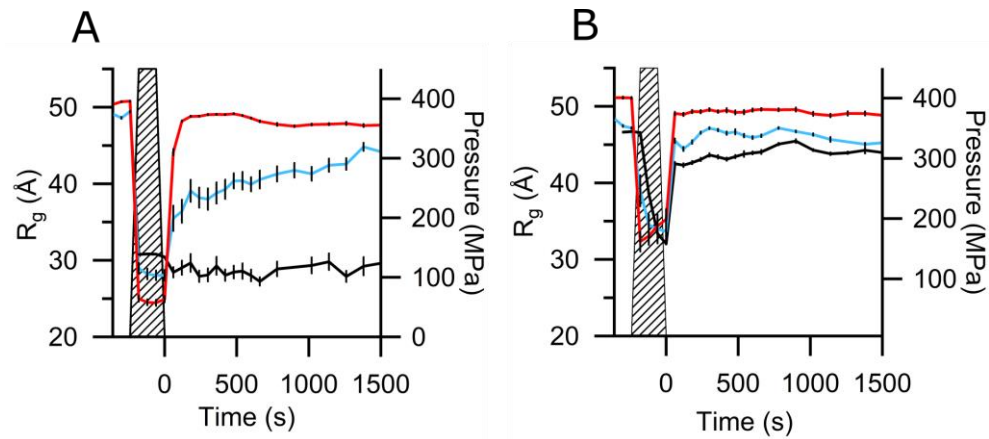

730  
731  
732  
733  
734

**Figure 3. Changes in ABfr  $R_g$  pre, during and post-pressurisation.** Pressure cycles were performed at 5 °C (A) and 25°C (B) in H<sub>2</sub>O (I = 0 mM, black), NaPi (45 mM, pH 7, I = 123 mM, blue) and in NaPi (45 mM, pH 7) + NaCl (250 mM) (I = 373 mM, red). Pressure level depicted as hashed region.



735

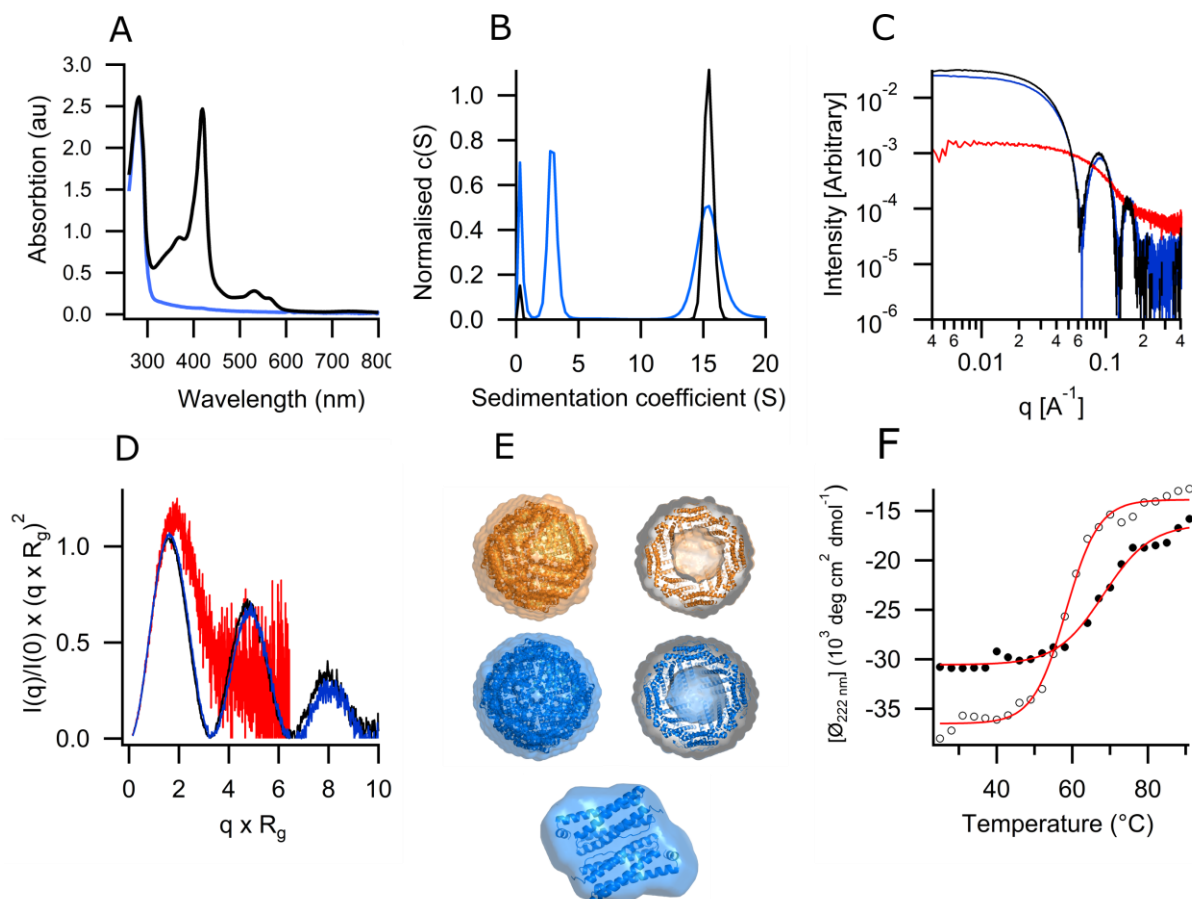

736

737

**Figure 4. Physicochemical characterization of ABfr and AABfr under ambient pressure. (A)**

UV/visible spectra of ABfr (black) and AABfr (blue). UV-visible spectra were recorded measured at a

protein concentration of approximately 50  $\mu\text{M}$  in sodium phosphate buffer (45 mM NaPi, 250 mM NaCl,

pH 7). Curves are normalised to  $A_{280} = 1$  to highlight differences in heme absorbance. **(B)** SV-AUC

$c(s)$  distributions for ABfr (black) and AABR (blue). Sedimentation velocity was measured at a protein

concentration of approximately 50  $\mu\text{M}$  in potassium phosphate buffer (45 mM KPi, 250 mM NaCl, pH

7) using a Beckmann ProteomeLab XL-I at 20°C and 24000 rpm. Data was collected at a wavelength

of 280 nm. Data file time stamps were corrected using REDATE, and continuous sedimentation

coefficient ( $c(s)$ ) distributions were fitted using SEDFIT. Buffer density ( $\rho = 1.003 \text{ g cm}^{-3}$ ) and viscosity

( $\eta = 1.0107 \text{ mPa s}$ ) were measured using an Anton-Paar rolling ball viscometer. The protein partial

specific volume was calculated from the primary sequence ( $\bar{v} = 0.736 \text{ cm}^3 \text{ g}^{-1}$ ). **(C)** HPLC-SAXS profiles

and **(D)** Kratky plots for ABfr icositetramer (black) and AABfr icositetramer (blue) and dimer (red). **(E)**

*Ab initio* bead model of ABfr (icositetramer, orange) and AABfr (icositetramer and dimer, blue), overlaid

with corresponding crystal structures (2VXI and 4CVP)<sup>57,58</sup>. Real space transformations were performed

using ScÅtter. The maximum diameter was determined by selecting values that resulted in high

reciprocal fit quality, and produced smooth, oscillation-free, real-space functions that decreased

smoothly to zero at high radius. A constant background was applied in the transformation, and real

space distributions were refined using the L1 norm of the Moore coefficients as a regularisation

target. The *ab initio* models were produced from refined pair distance distribution functions using

DAMMIF, and are DAMAVER averages of 23 runs. The models and crystal structures were visualized

using PyMOL. **(F)** Thermal denaturation far-UV circular dichroism spectra and fits for ABfr (open circles)

and AABfr (black circles). Data were collected at B23, Diamond Light Source, UK. Measurements were

performed in potassium phosphate buffer (45 mM, pH 7) at a protein concentration of 0.5  $\text{g L}^{-1}$ . Raw

data was converted to mean residue ellipticity and secondary structure analysis was performed using

CAPITO.

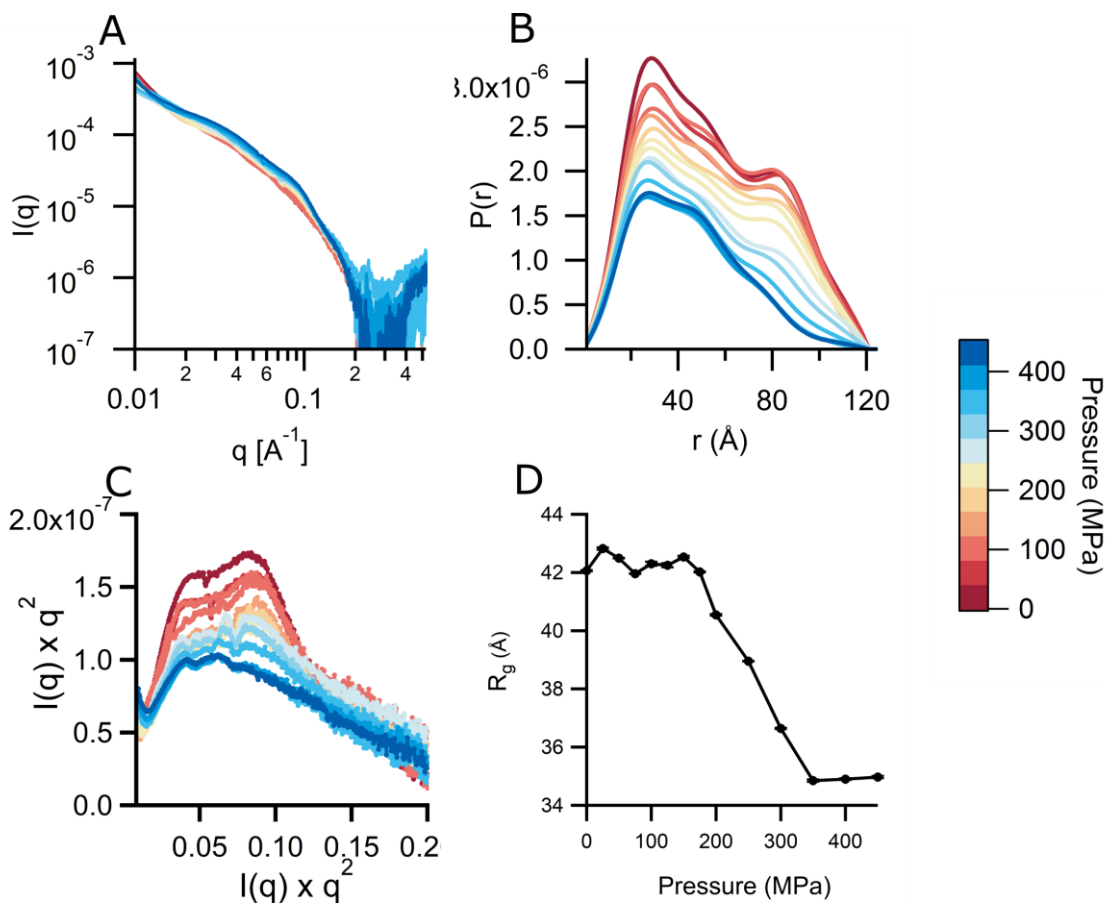

766

767 **Figure 5. Pressure dissociation of AABfr under equilibrium conditions between 0.1 and 450 MPa.**  
768 **(A)** reciprocal space SAXS profiles, **(B)** Pair distance distribution ( $P(r)$ ) functions, **(C)** Kratky plots and  
769 **(D)** Radius of gyration,  $R_g$ . SAXS data was collected between 0.1 MP (red) and 450 MPa (blue) at a  
770 protein concentration of 5 mg mL<sup>-1</sup> in 45 mM sodium phosphate buffer (pH 7). Real space  
771 transformations were performed using BAYESAPP, which uses Bayesian analysis to select parameters  
772 such as  $D_{max}$  and data noise level.<sup>74</sup>  $R_g$  was calculated from real space data.

773
