# 1 Controlling protein nanocage assembly with 2 hydrostatic pressure

3 *Kristian Le Vay*<sup>1,2</sup>, *Ben M. Carter*<sup>3</sup>, *Daniel W. Watkins*<sup>1</sup>, *T-Y. Dora Tang*<sup>1</sup>, *Valeska P.*  
4 *Ting*<sup>4</sup>, *Helmut Cölfen*<sup>5</sup>, *Robert P. Rambo*<sup>6</sup>, *Andrew J. Smith*<sup>6</sup>, *J. L. Ross*  
5 *Anderson*<sup>\*,1,7</sup>, *Adam W. Perriman*<sup>\*,3</sup>

6 <sup>1</sup>School of Biochemistry, University of Bristol, University Walk, Bristol, BS8 1TD,  
7 UK.

8 <sup>2</sup>Bristol Centre for Functional Nanomaterials, HH Wills Physics Laboratory,  
9 University of Bristol, Tyndall Avenue, Bristol, BS8 1TL, UK.

10 <sup>3</sup>School of Cellular and Molecular Medicine, University of Bristol, University Walk,  
11 Bristol, BS8 1TD, UK.

12 <sup>4</sup>Bristol Composites Institute (ACCIS), University of Bristol, Queen's Building BS8  
13 1TR, UK

14 <sup>5</sup>Department of Chemistry, University of Konstanz, Universitätsstraße 10, 78457  
15 Konstanz, Germany

16  
17 <sup>6</sup>Diamond Light Source Ltd., Diamond House, Harwell Science and Innovation  
18 Campus, Fermi Ave, Didcot OX11 0DE, UK

19  
20 <sup>7</sup>BrisSynBio Synthetic Biology Research Centre, Life Sciences Building, University of  
21 Bristol, Tyndall Avenue, Bristol, BS8 1TQ, UK.

22 \*Email: [ross.anderson@bristol.ac.uk](mailto:ross.anderson@bristol.ac.uk), [chawp@bristol.ac.uk](mailto:chawp@bristol.ac.uk)

23 **Controlling the assembly and disassembly of nanoscale protein cages is**  
24 **fundamental to the internalisation of protein and non-proteinaceous**  
25 **components for diverse bionanotechnological applications. To this end, here**  
26 **we study the reversible, pressure-induced dissociation of a natural protein**  
27 **nanocage, *E. coli* bacterioferritin (Bfr), principally using synchrotron radiation**  
28 **small angle X-ray scattering and circular dichroism. We demonstrate that**  
29 **hydrostatic pressures of 450 MPa are sufficient to completely dissociate the Bfr**  
30 **icositetramer into protein dimers, and the reversibility and kinetics of the**  
31 **reassembly process can be controlled by selecting appropriate buffer**  
32 **conditions. We also demonstrate that the heme B prosthetic group present at**  
33 **the subunit dimer interface influences the stability and pressure lability of the**  
34 **cage, despite its location being discrete from the inter-dimer interface that is**  
35 **key to cage assembly. This indicates a major cage-stabilising role for heme**  
36 **within this family of ferritins.**

37

38 Nanoscale protein cages are exceptionally attractive scaffolds for bionanotechnology  
39 and materials science, where they can be exploited as platforms for constructing  
40 robust and configurable therapeutic delivery vectors<sup>1</sup>, vaccines<sup>2</sup>, nanoreactors<sup>3,4</sup> and  
41 templates for the synthesis of diverse nanomaterials<sup>5-8</sup>. These multifunctional  
42 containers, both natural<sup>9-13</sup> and designed<sup>14,15</sup>, offer unparalleled control over size,  
43 shape, microenvironment, surface functionalisation and stability when constructing  
44 novel bionanomaterials.

45

46 The ability to control the assembly of such nanocages is an invaluable tool in the  
47 synthesis of complex materials, and can be instrumental in facilitating the

48 encapsulation of non-native nanomaterials. While this can be achieved by exploiting  
49 natural<sup>16–18</sup> or engineered<sup>19–21</sup> cage metastability, the use of such nanocages could  
50 ultimately compromise the robustness of the final assembled material. For nanocages  
51 with higher relative stability, harsher environmental conditions<sup>22,23</sup> are required that  
52 can adversely affect the protein cage, its functional modifications or the intended  
53 payload for encapsulation. New methods are therefore required to circumvent the  
54 necessity for harsh chemical conditions or specific interfacial engineering to promote  
55 cage instability, and to realise the full potential of these cages in bionanotechnology.

56

57 Here we report on how hydrostatic pressure can be employed to control the  
58 disassembly and reassembly of the protein nanocage bacterioferritin from *E. coli* (Bfr).  
59 While hydrostatic pressure has been previously employed to dissociate the weakly  
60 stable cage-like assembly HSP26<sup>24</sup>, the structure is not truly hollow<sup>25</sup>. There are  
61 currently no reports of complete, reversible hydrostatic pressure-induced dissociation  
62 in a highly robust nanocage such as ferritin<sup>26,27</sup>. While hydrostatic pressure has been  
63 applied to human ferritin to facilitate the loading of doxorubicin and increase protein  
64 recovery<sup>27</sup>, the assembly/disassembly of the cage under pressure was not  
65 investigated. Specifically, we use synchrotron radiation small angle X-ray scattering<sup>28</sup>  
66 to show that the Bfr nanocage dissociates reversibly under pressure, and that the  
67 reassembly can be controlled by altering solution conditions. Hydrostatic pressures of  
68 450 MPa were sufficient to induce reversible dissociation of the Bfr icositetramer into  
69 subunit dimers, and the reversibility of the pressure-induced dissociation was found to  
70 be highly dependent on ionic strength and temperature, allowing for control of  
71 oligomerisation state through pressurisation and selection of buffer conditions.  
72 Furthermore, we demonstrate that the pressure lability of the nanocage can be

73 modulated by removal of the native heme B prosthetic group. Our study exploits the  
74 ability of SAXS to probe the quaternary, tertiary and secondary structure of proteins,  
75 and will provide not only the means for studying the supramolecular assembly of these  
76 highly valuable nanocages, but will also inform future methodologies for controlling  
77 protein nanocage assembly for efficient payload encapsulation.

78

## 79 **Results & Discussion**

80 We initially probed the pressure-induced dissociation of the core-free, or apo-,  
81 bacterioferritin icositetramer (ABfr) by gradually raising the applied hydrostatic  
82 pressure in a diamond-windowed SAXS pressure cell to 450 MPa in 25 MPa  
83 increments, equilibrating for 40 seconds prior to data collection at each pressure. An  
84 oscillating scattering pattern was observed at low pressures (Figure 1a), characteristic  
85 of the hollow nanocage structure. With increasing pressure, fringes corresponding to  
86 the hollow sphere form factor broaden and then disappear, indicating increasing  
87 polydispersity and decreasing concentration of icositetramer due to dissociation into  
88 lower order oligomeric species. The presence of isosbestic points in the reciprocal  
89 space and Kratky data (Figure 1a and 1b), indicate that two species contribute to  $I(q)$   
90 with proportional stoichiometry. At higher pressures ( $> 300$  MPa), a slight drift in the  $q$   
91 value of the isosbestic points is observed, suggesting additional species likely  
92 contribute to the dissociation process.

93

94 From the pair distance distribution factor ( $P(r)$ ), we determined  $I(0)$  and the radius of  
95 gyration,  $R_g$  (Figure 1c), finding that the latter decreases non-linearly from 50 Å to 32  
96 Å over the pressures applied here (Figure 1d). This non-linear change in  $R_g$  with  
97 pressure is due to the power law dependence of  $R_g$  upon particle size, rather than

98 suggesting a cooperative dissociation mechanism. The data therefore indicate gradual  
99 icositetramer dissociation with multiple intermediates, and a final state in which the  
100 majority of species are small subunit oligomers. The  $P(r)$  distribution is characteristic  
101 of a hollow sphere until 250 MPa. The maximum of this distribution,  $P(r)_{max}$ , occurs at  
102  $r = 84 \text{ \AA}$ , corresponds to the distance between the cage center and the protein shell  
103 and decreases steadily with pressure, indicating gradual loss of the icositetramer. At  
104 high pressures, the magnitude at  $r = 84 \text{ \AA}$  tends to zero and a new  $P(r)_{max}$  emerges  
105 at  $r = 32 \text{ \AA}$ , corresponding to a subunit oligomer of ABfr, previously masked by that of  
106 the fully assembled cage.

107

108 Using a linear combination of theoretical SAXS data from various oligomeric  
109 components, we were able to identify possible dissociation pathways<sup>29,30</sup>. Our  
110 prediction of possible stable oligomers using the PISA (Proteins, Interfaces, Surfaces  
111 and Assemblies)<sup>31</sup> tool returned only the subunit dimer and icositetramer as stable  
112 states (Table S1). We then used single value decomposition to determine the number  
113 of required components (Figure S1 and S2) from the pressure dissociation SAXS, and  
114 constructed various models using oligomer structures derived from crystal structures  
115 of the ABfr icositetramer (Table S2, Figure S3 and S4). Two component models  
116 consisting of the icositetramer and a subunit oligomer provided the worst fits of the  
117 dataset (Table S3), though of these, the model consisting of the icositetramer and  
118 dimer best represented the data. Three component models generally provided better  
119 representations of the dissociation dataset, and all models in which the dimer was the  
120 lowest oligomeric state gave the best fit quality. Thus, in this pressure range, we  
121 assigned the initial and final state as icositetramer and dimer. Ultimately, we found  
122 that the data were best represented by models comprised of icositetramer, dimer and

123 an intermediate hexamer, octamer or dodecamer (Figure 1e). We acknowledge that  
124 there is no justification for selecting a specific intermediate state based on these data  
125 alone, and therefore refrain from doing so; the equivalence of the models and lack of  
126 cooperativity suggests that a range of intermediate states are present during  
127 dissociation. Although little work has been carried out on pressure-induced ferritin  
128 dissociation, there are many studies detailing pH and denaturant-induced dissociation  
129 and reassembly of mammalian ferritin<sup>32–37</sup>. The dissociation products and  
130 mechanisms of reassociation observed are consistent with the results obtained here,  
131 with dissociation to subunit dimer and reassociation *via* intermediate species including  
132 tetramers, hexamers and octamers most commonly reported.

133

134 To assess the effect of pressure on the internal structure, secondary structure and  
135 folding of ABfr, we used a combination of Kratky plot analysis and high pressure  
136 synchrotron radiation circular dichroism (CD). At low pressure, the Kratky plots for ABfr  
137 exhibit multiple bell shaped peaks at low  $q$  and converge to the baseline at high  $q$ ,  
138 indicating a globular, spherical structure (Figure 1b). At high pressure, low  $q$  peaks  
139 decrease in intensity and become less distinct, whilst the high  $q$  region diverges from  
140 the baseline, indicating a partially folded internal structure above 375 MPa. This may  
141 alter tertiary structure and interfacial interactions, destabilising the icositetramer  
142 structure. We observed no significant change in the circular dichroism spectra  
143 between 0.1 MPa and experimental limit of this technique, 200 MPa (Figure 1f), and  
144 predicted structural composition *via* basis spectra remained constant (alpha helix =  
145 0.99, beta sheet, 0.01)<sup>38</sup>. The CD data support the SAXS data in this pressure range,  
146 and it is therefore likely that the observed changes in quaternary structure up to 375

147 MPa are due to the system shifting towards a lower volume state, rather than  
148 significant perturbation of the ABfr secondary structure<sup>39</sup>.

149

150 We then explored the reversibility of the pressure dissociation process. Initially, ABfr  
151 in 45 mM sodium phosphate (NaPi) buffer was pressurised to 450 MPa and held for 5  
152 minutes before pressure release (Figure 2a). An immediate depression in  $R_g$  was  
153 observed, and the hollow spherical structure was lost after 30 seconds. Fitting the  
154 change in icositetramer volume fraction against time with a single exponential function  
155 (Figure S5), the observed rate constant ( $k_{diss}$ ) of dissociation was determined to be  
156  $0.114 \pm 0.002 \text{ s}^{-1}$ . Almost complete reassembly occurred over 30 minutes following  
157 depressurisation, as apparent from the recovery of the radius of gyration over time  
158 (Figure 2a) and the hollow cage form of the  $P(r)$  function (Figure 2b). Again, fitting the  
159 change in icositetramer volume fraction against time with a single exponential function  
160 (Figure S7), the observed rate constant of reassociation ( $k_{ass}$ ), was determined to be  
161  $0.006 \pm 0.001 \text{ s}^{-1}$  (Figure S5). Following reassociation, we noted that the final  $R_g$  and  
162  $I(0)$  values were slightly lower than initial values (Figure 2a, b). To quantify the degree  
163 of reassociation and to control for possible radiation damage or background mismatch,  
164 a sample of ABfr was pressurised under identical conditions without SAXS  
165 measurement. Analytical ultracentrifugation (AUC) before pressurisation (Figure 2c,  
166 Table S4) demonstrated that ABfr is almost fully assembled as the icositetramer ( $S_{20, w} = 15.76$ ,  
167  $MW = 424 \text{ kDa}$ ). Following pressurisation ( $t = 60 \text{ minutes}$ ), 94.3% of ABfr  
168 was assembled in the icositetramer state ( $S_{20, w} = 16.1$ ,  $MW = 426 \text{ kDa}$ ), with the  
169 remaining material present as the subunit dimer ( $S_{20, w} = 3.53$ ,  $MW = 44.5 \text{ kDa}$ ). TEM  
170 imaging confirmed the presence of assembled ABfr cages before and after  
171 pressurisation, with no apparent change in morphology (Figure 2d, e).

172

173 The rate of reassociation under these conditions appears slow, and is significantly  
174 slower than the calculated dimer collisional frequency<sup>40</sup> ( $f_{25^{\circ}\text{C}} = 6.79 \times 10^5 \text{ S}^{-1}$  at 25°C)  
175 demonstrating unequivocally that reassembly is not diffusion limited. We then sought  
176 to determine whether recovery from pressure induced conformational drift influenced  
177 the kinetics of reassociation<sup>41,42</sup>. We assessed the degree of protein denaturation by  
178 inspection of a normalised Kratky plot (Figure 2f), in which globular protein exhibits a  
179 maximum value of 1.104 for  $qR_g = \sqrt{3}$ , whilst unfolded protein has a maximum value of  
180 1.5-2<sup>43</sup>. This plot confirmed that the protein recovers almost immediately from the  
181 denatured state after pressure release, so the process is unlikely to be refolding-  
182 mediated.

183

184 The relatively slow rate of association may also be due to a kinetic barrier in the  
185 association process which could arise from repulsive interactions between subunit  
186 dimers. To determine the types of interaction dominant in this process, we explored  
187 the effect of ionic strength and temperature on the nanocage reassembly, finding  
188 strong correlation between these parameters and the rate and completeness of  
189 nanocage reassembly (Figure 3, Table S5). We observed the most efficient  
190 reassembly in high ionic strength sodium phosphate buffer (45 mM, 250 mM NaCl, pH  
191 7;  $I = 373 \text{ mM}$ ), with higher initial  $R_g$  than the low ionic strength buffers and almost  
192 complete reassembly at both 5 and 25 °C. In contrast, the assembly was notably  
193 slower and less complete in lower ionic strength sodium phosphate buffer (pH 7, 45  
194 mM;  $I = 123 \text{ mM}$ ) at both temperatures, with only gradual recovery of  $R_g$  over the 1500  
195 seconds of measurement. Most notably, the reassembly process in water was  
196 significantly impaired at 25 °C, and was effectively arrested at 5 °C, with no



197 discernable increase in  $R_g$  observed over 1500 seconds, indicating the presence of  
198 only discrete subunit dimers within this timeframe. Given these data, we propose that  
199 the reassembly of ABfr nanocages is likely driven by hydrophobic dispersion forces  
200 while opposed by coulombic repulsion.

201

202 Similar ionic strength dependencies on nanocage reassembly were observed for the  
203 naturally heme-free *E. coli* ferritin FtnA<sup>44</sup> following low pH-induced dissociation, and it  
204 is likely that the origin of this effect lies at the interface between ferritin subunit dimers,  
205 which associate to form the highly charged, carboxylate-rich ion channels at the C3  
206 and C4 interfaces<sup>45–47</sup>. The increased degree and rate of reassembly with temperature  
207 is a strong indication that assembly is entropically driven by the formation of weak  
208 protein-protein interactions<sup>48</sup>. For oligomeric assemblies, the enthalpic contribution  
209 ( $\Delta H$ ) is generally small, because the strength of protein-water and water-water  
210 interactions are similar. As such, increasing temperature decreases the Gibb's free  
211 energy of association ( $\Delta G^{\text{ass}}$ ) and favours assembly.

212

213 We also observed a greater degree of dissociation following pressurization at 5°C (5  
214 minutes at 450 MPa) at all ionic strengths tested here; previous studies of pressure-  
215 induced viral capsid dissociation have reported similar effects, and were attributed to  
216 a strong entropic contribution to the free energy of association<sup>49</sup>. In these cases,  
217 higher temperatures lower  $\Delta G^{\text{ass}}$ , promoting association in systems where entropic  
218 contributions to the free energy dominate. Once the interfacial protein-protein  
219 interactions (principally salt bridges and dispersion interactions) are broken and the  
220 oligomers dissociate, dipole-dipole protein-water interactions are formed in their  
221 place<sup>49,50</sup>. At high pressure, inherently shorter dipole interactions are favoured over

222 dispersion interactions due to the differential effect of compression on bond strength,  
223 and dissociation occurs due to the increasing formation of protein-water interactions.  
224 In addition, the hydration of hydrophobic surfaces is more favourable at high pressure,  
225 as the ordered solvation shell is denser than the bulk solvent. Both similar and  
226 contrasting behaviours have been reported for viral capsids under pressure. Silva *et*  
227 *al.*<sup>51,52</sup> demonstrated that the 86-subunit bromegrass mosaic virus capsid undergoes  
228 a reversible partial dissociation into dimers upon application of pressure (10%  
229 dissociation at 200 MPa). In contrast, the turnip yellow mosaic virus irreversibly  
230 decapsidates rather than dissociates under pressure, resulting loss of RNA and  
231 formation of a holed capsid, as the subunit interface contains few pressure sensitive  
232 salt bridge and is rich in pressure insensitive hydrogen bonding interactions<sup>53</sup>.

233

234 We subsequently investigated the ability of the native heme B prosthetic group to  
235 modulate cage stability. Using a well-established procedure for tetrapyrrole extraction,  
236 we removed heme B from an acidified water:2-butanone mixture and confirmed the  
237 successful removal by UV/visible spectroscopy (Figure 4a)<sup>54</sup>. We next explored the  
238 composition of oligomeric species in this apo-apo-Bfr (AABfr) by sedimentation  
239 velocity analytical ultracentrifugation (SV-AUC, Figure 4b). In contrast to the heme  
240 containing ABfr, the SV-AUC distribution reveals a mixture of assembled icositetramer  
241 ( $S_{(20, w)} = 15.85$ , MW = 427.1 kDa, 62.1%) and subunit dimer ( $S_{(20, w)} = 2.97$ , MW =  
242 34.7 kDa, 37.9%). The icositetramer peak is broadened, indicating greater  
243 polydispersity and potentially incomplete assembly. We further characterized this  
244 mixture of species by high-performance liquid chromatography-SAXS (HPLC-SAXS)  
245 (Figure 4c), and observed scattering patterns consistent with both the assembled  
246 icositetrameric nanocage ( $R_g = 49.88 \text{ \AA}$ ), and a smaller ellipsoidal or parallelepipedal

247 particle<sup>55</sup>. The extrapolated  $R_g$  (22.21 Å) of the smaller particle is in good agreement  
248 with that calculated for the subunit dimer (PDBID: 2VXI,  $R_g = 21.16$  Å)<sup>56</sup>, and the Kratky  
249 plot (Figure 4d) indicates a folded structure, although with a greater degree of disorder  
250 than the AABfr icositetramer. We used bead modelling to analyse the SAXS data for  
251 both the ABfr and AABfr icositetramers and found excellent agreement between the  
252 hollow spherical models and the published Bfr crystal structure (Figure 4e)<sup>56</sup>. Similarly,  
253 the bead model of the AABfr subunit dimer closely overlays with the crystal structure  
254 of the AABfr dimer (PDBID: 4CVP)<sup>57</sup>. To further probe the effects of removing heme B  
255 from the nanocages, we used circular dichroism spectroscopy to determine the  
256 thermal stabilities of the Bfr samples. We found the denaturation midpoints of ABfr ( $T_m$   
257 = 68°C) and AABfr ( $T_m = 58$ °C) in agreement with previously reported values<sup>58,59</sup>,  
258 confirming that removal of heme B has an overall destabilizing effect on the protein.  
259 Comparison of the ABfr and AABfr subunit dimer crystal structures reveals slight  
260 secondary and tertiary structure differences that may impact the ability of the dimer to  
261 assemble into the icositetramer (Figure S6). In particular, the position of the E helix is  
262 shifted in the heme free protein; this helix lies at the tetramerization interface and is  
263 essential for cage assembly (Figure S7)<sup>60</sup>.

264

265 These data indicate that the binding of heme B not only leads to an increase in thermal  
266 stability of the bulk Bfr protein, but it specifically stabilises the nanocage assembly.  
267 While such increases in thermal stability induced through cofactor binding in heme-  
268 proteins are widely reported, the bound cofactor's impact on cage stability and  
269 assembly is unknown<sup>61</sup>. To determine the effect of heme B on the pressure stability of  
270 Bfr, we pressurised AABfr to 450 MPa in 25 MPa increments, allowing time at each  
271 step for equilibration before SAXS measurement (Figure 5a). We found the real space

272 distribution for ABfr at ambient pressure is representative of a mixture of assembled  
273 icositetramers and smaller subunit oligomers, in good agreement with the SV-AUC  
274 data described above (Figure 5b). The icositetramer nanocage structure visible in the  
275 real space distribution is rapidly lost with applied pressure, whilst the final state  
276 resembles a mixture of the subunit dimer and other lower order oligomers. The Kratky  
277 plots demonstrate a less globular structure than ABfr at similar pressures, and do not  
278 reveal any further unfolding over the pressure range (Figure 5c). The initial  $R_g$  for  
279 AABfr (42 Å) is notably lower than that of ABfr (50 Å) due to the mixture of icositetramer  
280 and dimer at ambient pressure. The  $R_g$  remains constant until 175 MPa, then  
281 decreases, reaching a plateau at 350 MPa, demonstrating that AABfr is significantly  
282 less pressure stable than ABfr (Figure 5d). The final  $R_g$  of 35 Å, was higher than that  
283 of ABfr (32 Å), suggesting a dissociation endpoint with a different oligomeric state.  
284

## 285 **Conclusions**

286 We have demonstrated here that hydrostatic pressure is a valuable method to control  
287 and modulate the assembly, disassembly and oligomeric composition of the  
288 bacterioferritin nanocage. It is highly likely that this methodology can be extended to  
289 other protein nanocages, especially those stabilized primarily by hydrophobic  
290 interactions. Since the method we report here is also gentle, tunable and not limited  
291 to intrinsically metastable or mutationally compromised cages, more robust hybrid  
292 materials tolerant of harsh environmental conditions are potentially accessible. Full  
293 cage dissociation might also provide a route to higher loading ratios of therapeutic  
294 molecules or larger payloads unable to traverse the protein cage, leading, for example,  
295 to significantly improved synthetic routes to nanocage-based drug delivery vehicles.

296

297 Furthermore, we have also demonstrated that the heme B prosthetic groups  
298 significantly enhance the Bfr nanocage stability. While it has been previously reported  
299 that heme B facilitates electron transfer and iron release from the Bfr core, this can  
300 occur in the absence of the prosthetic group and it is notable that heme B is absent in  
301 many/most of the known ferritins. It therefore seems plausible that an additional major  
302 role of heme B in Bfr is to stabilise the protein nanocage, thus enabling the retention  
303 of the protein superstructure for iron mineralisation.

304

## 305 **Methods**

### 306 **Protein expression and purification**

307 Bacterioferritin expression was carried out in T7 express *E. coli* BL21 (DE3) cells using  
308 a modified pUC119 plasmid, PGS281 as described in Andrews *et al*<sup>62</sup>. Cultures were  
309 grown aerobically at 37 °C in LB media containing 34 µg mL<sup>-1</sup> carbenicillin. Flasks  
310 were shaken for 24 hours at 200 rpm, before cultures were harvested by centrifugation  
311 (10 minutes, 7277 xg rcf). The pellets were washed then re-suspended in lysis buffer  
312 (1.5 mM KH<sub>2</sub>PO<sub>4</sub>, 8 mM Na<sub>2</sub>HPO<sub>4</sub>, 150 mM NaCl, 3 mM KCl, pH 7).  
313 Phenylmethylsulfonyl fluoride (PMSF) (1 mM) was added, and then cells were lysed  
314 using a probe sonicator (3 × 20s, maximum amplitude). The crude extract was then  
315 centrifuged (47808 xg, 60 minutes). The supernatant was decanted, heated to 70 °C  
316 for 15 minutes, then cooled and centrifuged (47808 xg, 30 minutes). The supernatant  
317 was concentrated using a centrifugal concentrator (MWCO = 50 kDa) to half the  
318 original volume. The extract was purified by size exclusion chromatography using a  
319 Sephadex S200 26/600 column equilibrated with lysis buffer at a flow rate of 2.3 mL  
320 *per* minute. Bfr containing fractions were pooled, concentrated, and then further  
321 purified by anion exchange chromatography using a Q-Sepharose FF column. The  
322 target protein was eluted with a linear gradient of 0-0.3 M NaCl in histidine buffer (20  
323 mM histidine.HCl, pH 5.5). The purified protein was dialysed in a solution of EDTA (10  
324 mM) and DTT (5 mM) to remove the native core, forming ABfr.

325

### 326 **High pressure SAXS measurement**

327 Data collection was carried out at the I22 beamline, Diamond Light Source (DLS,  
328 Harwell, UK), using a hydrostatic pressure cell with a maximum operation pressure of  
329 500 MPa<sup>28</sup>. Samples were loaded into thin-wall polycarbonate capillaries ( $\theta=2$  mm),

330 which were then sealed with a rubber bung and two-part adhesive. The beam energy  
331 was 18 keV ( $\lambda = 0.69 \text{ \AA}$ ) to reduce absorption from the diamond windows and water in  
332 the beam path. ABfr samples were prepared at a concentration of  $5 \text{ mg mL}^{-1}$  in a range  
333 of buffers and centrifuged (10 minutes,  $16000 \times g$ ) prior to measurement. The collection  
334 time for individual measurements was between 6 and 60 s. Hydrostatic pressure  
335 experiments were performed under both equilibrium and dynamic, time resolved  
336 conditions. In the former, the pressure was raised in incremental steps allowing time  
337 for equilibrium before measurement. The beam was blocked during equilibration to  
338 prevent radiation damage. In dynamic experiments the sample was pressurised, held  
339 at pressure, then returned to ambient pressure whilst measuring the time resolved  
340 scattering pattern. Pressure jump experiments were conducted in which pressure was  
341 increased rapidly to 450 MPa whilst measuring the time resolved scattering.

342

343 The data were collected using a Pilatus P3-2M detector. The sample to detector  
344 distance was 6 m, providing a  $q$ -range of  $0.008\text{-}0.52 \text{ \AA}^{-1}$ . The two-dimensional data  
345 sets were reduced using DAWN<sup>63</sup>. Briefly, the  $q$ -axis was calibrated using with a silver  
346 behenate standard data, then detector images were masked, radially averaged from  
347 the beam centre and normalised to absolute intensity using a glassy carbon standard.  
348 Background subtraction was carried out using a user-written python script (Figure S8  
349 and S9) to account for background mismatch in the high- $q$  data region. This mismatch  
350 resulted from the necessity of using different capillaries for sample and background,  
351 and slight changes in cell and capillary position when changing samples. Whilst this  
352 mismatch was generally low, systemic under-subtraction at low pressure and over-  
353 subtraction at high pressure was present across data sets. The background  
354 measurement was multiplied by a constant to align the high- $q$  region with that of the

355 sample. The median  $I(q)$  of the region  $q = 0.3-0.4 \text{ \AA}^{-1}$  was determined for both sample  
356 and background data. The background was then multiplied by a constant,  $k$ , such that  
357 the corrected median  $I(q)$  of the background was equal to the median  $I(q)$  of the sample  
358 minus a small constant,  $A$ . The scaling constant was therefore:

359

$$360 \quad k = \frac{I(q)_{sample} - A}{I(q)_{background}} \quad q = 0.3 - 0.4 \text{ \AA}^{-1}$$

361 This method was effective in background matching the high- $q$  data region and  
362 preventing over and under subtraction with  $k = 1 \times 10^{-5}$ . Example data corrections for  
363 ABfr at 0.1 MPa and 200 MPa are shown in Figure S8. The background adjustment  
364 results in lower overall  $I(q)$  relative to the unprocessed data, but the shape of the  
365 scattering curve is preserved. Artefacts resulting from Kossel lines are visible in the  
366 data at 200 MPa at  $q = 0.016$  and  $0.7 \text{ \AA}^{-1}$  despite background subtraction. The effect  
367 is most visible in the 2D detector image, shown in Figure S9. Kossel lines are observed  
368 between 100-300 MPa in both background and sample images. The intensity of the  
369 effect is pressure dependent, and line position is dependent on the orientation of the  
370 diamond windows. Care was taken to repeat background measurements following  
371 window changes. However, mismatched line intensity between sample and  
372 background resulted in artefacts in the reduced data. The mismatch occurs due to the  
373 pressure dependence of line intensity: whilst pressure control is accurate to 0.1 MPa  
374 in this apparatus, slight pressure loss often occurs during measurement due to  
375 leakage. Consequently, pressure differences between samples and background  
376 measurements of up to 0.3 MPa are observed. Although visible in the data, the  
377 artefacts are small and not expected to affect subsequent fitting and data analysis.  
378 Parasitic scattering is present in some data sets, particularly where Kossel lines



379 intersect with the beam-stop (Figure S9 (200 MPa)). This effect is not effectively  
380 removed by background subtraction, and manifests as aggregation-like scattering at  
381  $q < 0.04 \text{ \AA}^{-1}$ , which precludes the use of Guinier methods for the approximation of  $I(0)$   
382 and  $R_g$ , but does not affect the determination of these parameters from the indirect  
383 Fourier transform of the data.

384

### 385 **Circular Dichroism**

386 Circular dichroism (CD) spectroscopy was used to determine the relative thermal  
387 stabilities of ABfr and AABfr and to investigate the secondary structure of both  
388 proteins. Solutions of ABfr or AABfr ( $0.5 \text{ g L}^{-1}$ ) were prepared in 45 mM sodium  
389 phosphate buffer (pH 7). The far UV spectrum (190-260 nm) was measured at 25 °C,  
390 then the temperature was increased in 3 degree increments allowing for equilibration  
391 (300s) at each step. The helical content was measured by monitoring mean residue  
392 ellipticity at  $\lambda = 222 \text{ nm}$ . The thermal denaturation midpoint temperature was  
393 determined using sigmoidal fits of the raw the  $[\theta_{222 \text{ nm}}]$  data and from the maxima in  
394 first differential of the  $[\theta_{222 \text{ nm}}]$  data (Figure 4f). Secondary structure composition was  
395 determined by linear combination of basis spectra using CAPITO<sup>38</sup>.

396

### 397 **High pressure circular dichroism**

398 High pressure circular dichroism measurements were carried out at the B23 beamline,  
399 Diamond Light Source (DLS, Harwell, UK), using a hydrostatic pressure cell with a  
400 maximum operation pressure of 200 MPa<sup>64</sup>. Results obtained were processed using  
401 CDApps and OriginLab. Secondary structure estimation from CD spectra was carried  
402 out using the CAPITO CD analysis and plotting tool<sup>38</sup>.

403

#### 404 **Sedimentation velocity analytical ultracentrifugation**

405 Sedimentation velocity was measured in sodium phosphate buffer (45 mM NaPi, 250  
406 mM NaCl, pH 7) using a Beckmann ProteomeLab XL-I at 20 ° C and 24000 rpm. Data  
407 were collected at a wavelength of 418 nm. Date file time stamps were corrected using  
408 REDATE, and continuous sedimentation velocity coefficient ( $c(S)$ ) distributions were  
409 produced using SEDFIT. Buffer density and viscosity were measured using an Anton-  
410 Paar rolling ball viscometer. The protein partial specific volume was calculated from  
411 the primary sequence ( $\bar{v} = 0.736 \text{ cm}^3 \text{ g}^{-1}$ ).

412

#### 413 **PISA analysis of ABfr**

414 A bioinformatics approach was adopted in order to identify potential dissociation states  
415 of ABfr under pressure. The Proteins, Interfaces, Structures and Assemblies (PISA)  
416 tool was used to calculate overall solvent accessible surface areas, solvation free  
417 energies ( $\Delta G^{\text{int}}$ ) and dissociation free energies ( $\Delta G^{\text{diss}}$ ) for stable subunit oligomers of  
418 ABfr<sup>31,65,66</sup>. The PISA analysis identifies thermodynamically stable assemblies of  
419 subunits based on interfacial interactions. For ABfr, only the fully assembled  
420 icositetramer and dimer were identified as stable quaternary structures in solution. The  
421 surface areas and free energies of these species are shown in Table S1. The free  
422 energy of dissociation,  $\Delta G^{\text{diss}}$ , corresponds to the free energy difference between  
423 associated and dissociated states. A positive value indicates that the assembled state  
424 is stable under standard conditions.

425

#### 426 **SVD reconstruction of ABfr equilibrium pressure dissociation.**

427 SVDPLOT and Ultrascan II were used to produce a set of basis eigenvectors and  
428 eigenvalues for the ABfr dataset (Figure S1)<sup>67</sup>. A non-parameterised runs test was

429 used to identify non-random curves in the eigenvector set<sup>68</sup>. Eigenvectors with  $p <$   
430 0.05 were deemed to be non-random, yielding 12 significant eigenvectors. Inspection  
431 of the ABfr eigenvectors revealed that those with the highest two eigenvalues are  
432 smooth curves reminiscent of scattering form factors, and so are likely to contain  
433 structural information corresponding to the initial icositetramer and oligomeric  
434 dissociation products. The subsequent curves are structured but contain significant  
435 noise, and may contain contributions from minor species as well as background  
436 components due to imperfect background subtraction. The data were then  
437 reconstructed incrementally by adding eigenvectors to the model in order of  
438 decreasing significance. The root mean squared deviation between the reconstructed  
439 datasets and the experimental curves was calculated at each stage (Figure S2).

440

#### 441 **Acknowledgements**

442 This work was supported at the University of Bristol by the Bristol Centre for Functional  
443 Nanomaterials (EPSRC Doctoral Training Centre Grant EP/G036780/1) through a  
444 studentship for K.L.V. We acknowledge Diamond Light Source for time on I22 under  
445 proposals SM8237, SM9367, and SM11615, for time on B21 under proposals  
446 SM10054, SM1318 and SM16020, and for time on B23 under proposal SM14069.

447

#### 448 **Author Contributions**

449 J.L.R.A and A.W.P conceived the project; K.L.V., D.W., B.C., D.T., V.T., and  
450 A.J.S. performed the experiments; K.L.V., B.C., R.R., A.J.S., J.L.R.A. and  
451 A.W.P. discussed the results; K.L.V. and J.L.R.A. wrote the manuscript.

452

453

454 **Supporting Information**

455 PISA analysis, detailed AUC data, structural models and additional SAXS data  
456 including single value decomposition, calculated  $P(r)$  distributions, OLIGOMER  
457 models, ABfr dissociation data and background subtraction examples are provided in  
458 the supporting information.

## 459 **References**

- 460 1. Bhaskar, S. & Lim, S. Engineering protein nanocages as carriers for biomedical  
461 applications. *NPG Asia Materials* **9**, e371–e371 (2017).
- 462 2. Kanekiyo, M. *et al.* Self-assembling influenza nanoparticle vaccines elicit  
463 broadly neutralizing H1N1 antibodies. *Nature* **499**, 102–106 (2013).
- 464 3. Ren, H., Zhu, S. & Zheng, G. Nanoreactor design based on self-assembling  
465 protein nanocages. *Int. J. Mol. Sci.* **20**, (2019).
- 466 4. Maity, B., Fujita, K. & Ueno, T. Use of the confined spaces of apo-ferritin and  
467 virus capsids as nanoreactors for catalytic reactions. *Curr. Opin. Chem. Biol.* **25**,  
468 88–97 (2015).
- 469 5. Douglas, T. & Stark, V. T. Nanophase cobalt oxyhydroxide mineral synthesized  
470 within the protein cage of ferritin. *Inorg. Chem.* **39**, 1828–1830 (2000).
- 471 6. Yamashita, I., Hayashi, J. & Hara, M. Bio-template Synthesis of Uniform CdSe  
472 Nanoparticles Using Cage-shaped Protein, Apoferritin. *Chem. Lett.* **33**, 1158–  
473 1159 (2004).
- 474 7. Ueno, T. *et al.* Size-selective olefin hydrogenation by a Pd nanocluster provided  
475 in an apo-ferritin cage. *Angew. Chemie - Int. Ed.* **43**, 2527–2530 (2004).
- 476 8. Douglas, T. *et al.* Protein engineering of a viral cage for constrained  
477 nanomaterials synthesis. *Adv. Mater.* **14**, 415–418 (2002).
- 478 9. He, D. & Marles-Wright, J. Ferritin family proteins and their use in  
479 bionanotechnology. *N. Biotechnol.* **32**, 651–657 (2015).
- 480 10. Jutz, G., Van Rijn, P., Santos Miranda, B. & Böker, A. Ferritin: A versatile  
481 building block for bionanotechnology. *Chem. Rev.* **115**, 1653–1701 (2015).
- 482 11. Putri, R. M. *et al.* Structural Characterization of Native and Modified Encapsulins  
483 as Nanoplatfoms for in Vitro Catalysis and Cellular Uptake. *ACS Nano* **11**,

- 484 12796–12804 (2017).
- 485 12. Choi, S. H., Kwon, I. C., Hwang, K. Y., Kim, I. S. & Ahn, H. J. Small heat shock  
486 protein as a multifunctional scaffold: Integrated tumor targeting and caspase  
487 imaging within a single cage. *Biomacromolecules* **12**, 3099–3106 (2011).
- 488 13. Azuma, Y., Edwardson, T. G. W. & Hilvert, D. Tailoring lumazine synthase  
489 assemblies for bionanotechnology. *Chemical Society Reviews* **47**, 3543–3557  
490 (2018).
- 491 14. Butterfield, G. L. *et al.* Evolution of a designed protein assembly encapsulating  
492 its own RNA genome. *Nature* **552**, 415–420 (2017).
- 493 15. Malay, A. D. *et al.* An ultra-stable gold-coordinated protein cage displaying  
494 reversible assembly. *Nature* **569**, 438–442 (2019).
- 495 16. Swift, J., Butts, C. A., Cheung-Lau, J., Yerubandi, V. & Dmochowski, I. J.  
496 Efficient Self-Assembly of *Archaeoglobus fulgidus* ferritin around metallic cores.  
497 *Langmuir* **25**, 5219–5225 (2009).
- 498 17. Sana, B., Johnson, E. & Lim, S. The unique self-assembly/disassembly property  
499 of *Archaeoglobus fulgidus* ferritin and its implications on molecular release from  
500 the protein cage. *Biochim. Biophys. Acta - Gen. Subj.* **1850**, 2544–2551 (2015).
- 501 18. Nasrollahi, F. *et al.* Incorporation of Graphene Quantum Dots, Iron, and  
502 Doxorubicin in/on Ferritin Nanocages for Bimodal Imaging and Drug Delivery.  
503 *Adv. Ther.* **3**, 1900183 (2020).
- 504 19. Fletcher, J. M. *et al.* Self-assembling cages from coiled-coil peptide modules.  
505 *Science (80-. )*. **340**, 595–599 (2013).
- 506 20. Peng, T. & Lim, S. Trimer-based design of pH-responsive protein cage results  
507 in soluble disassembled structures. *Biomacromolecules* **12**, 3131–3138 (2011).
- 508 21. Dalmau, M., Lim, S. & Wang, S. W. Design of a pH-dependent molecular switch

- 509 in a caged protein platform. *Nano Lett.* **9**, 160–166 (2009).
- 510 22. Pontillo, N., Pane, F., Messori, L., Amoresano, A. & Merlino, A. Cisplatin  
511 encapsulation within a ferritin nanocage: A high-resolution crystallographic  
512 study. *Chem. Commun.* **52**, 4136–4139 (2016).
- 513 23. Liu, X. *et al.* Apoferritin-CeO<sub>2</sub> nano-truffle that has excellent artificial redox  
514 enzyme activity. *Chem. Commun.* **48**, 3155–3157 (2012).
- 515 24. Skouri-Panet, F., Quevillon-Cheruel, S., Michiel, M., Tardieu, A. & Finet, S.  
516 sHSPs under temperature and pressure: The opposite behaviour of lens alpha-  
517 crystallins and yeast HSP26. *Biochim. Biophys. Acta - Proteins Proteomics*  
518 **1764**, 372–383 (2006).
- 519 25. White, H. E. *et al.* Multiple Distinct Assemblies Reveal Conformational Flexibility  
520 in the Small Heat Shock Protein Hsp26. *Structure* **14**, 1197–1204 (2006).
- 521 26. Zhang, T. *et al.* Effect of high hydrostatic pressure (HHP) on structure and  
522 activity of phytoferritin. *Food Chem.* **130**, 273–278 (2012).
- 523 27. Wang, Q. *et al.* High hydrostatic pressure encapsulation of doxorubicin in ferritin  
524 nanocages with enhanced efficiency. *J. Biotechnol.* **254**, 34–42 (2017).
- 525 28. Brooks, N. J. *et al.* Automated high pressure cell for pressure jump x-ray  
526 diffraction. *Rev. Sci. Instrum.* **81**, 064103 (2010).
- 527 29. Svergun, D., Barberato, C. & Koch, M. H. CRYSOLE - A program to evaluate X-  
528 ray solution scattering of biological macromolecules from atomic coordinates. *J.*  
529 *Appl. Crystallogr.* **28**, 768–773 (1995).
- 530 30. Konarev, P. V., Volkov, V. V., Sokolova, A. V., Koch, M. H. J. & Svergun, D. I.  
531 PRIMUS: A Windows PC-based system for small-angle scattering data analysis.  
532 *J. Appl. Crystallogr.* **36**, 1277–1282 (2003).
- 533 31. Krissinel, E. & Henrick, K. Inference of Macromolecular Assemblies from

- 534 Crystalline State. *J. Mol. Biol.* **372**, 774–797 (2007).
- 535 32. Stefanini, S., Vecchini, P. & Chiancone, E. On the Mechanism of Horse Spleen  
536 Apoferritin Assembly: A Sedimentation Velocity and Circular Dichroism Study.  
537 *Biochemistry* **26**, 1831–1837 (1987).
- 538 33. Gerl, M. & Jaenicke, R. Mechanism of the self-assembly of apoferritin from horse  
539 spleen - Cross-linking and spectroscopic analysis. *Eur. Biophys. J.* **15**, 103–109  
540 (1987).
- 541 34. Banyard, S. H., Stammers, D. K. & Harrison, P. M. Electron density map of  
542 apoferritin at 2.8-Å resolution. *Nature* **271**, 282–284 (1978).
- 543 35. Sato, D. *et al.* Ferritin Assembly Revisited: A Time-Resolved Small-Angle X-ray  
544 Scattering Study. *Biochemistry* **55**, 287–293 (2016).
- 545 36. Kilic, M. a, Spiro, S. & Moore, G. R. Stability of a 24-meric homopolymer:  
546 comparative studies of assembly-defective mutants of *Rhodobacter capsulatus*  
547 bacterioferritin and the native protein. *Protein Sci.* **12**, 1663–1674 (2003).
- 548 37. Andrews, S. C. *et al.* Physical, chemical and immunological properties of the  
549 bacterioferritins of *Escherichia coli*, *Pseudomonas aeruginosa* and *Azotobacter*  
550 *vinelandii*. *Biochim. Biophys. Acta - Protein Struct. Mol. Enzymol.* **1078**, 111–  
551 116 (1991).
- 552 38. Wiedemann, C., Bellstedt, P. & Görlach, M. CAPITO - A web server-based  
553 analysis and plotting tool for circular dichroism data. *Bioinformatics* **29**, 1750–  
554 1757 (2013).
- 555 39. Weber, G. Thermodynamics of the association and the pressure dissociation of  
556 oligomeric proteins. *J. Phys. Chem.* **97**, 7108–7115 (1993).
- 557 40. Atkins, P. & de, P. J. Atkins' Physical Chemistry, 7th Edition. *Oxford Univ. Press*  
558 (2002).



- 559 41. Ward, A. B., Sali, A. & Wilson, I. A. Integrative Structural Biology. *Science* (80-  
560 ). **339**, 913–915 (2013).
- 561 42. Brooks-Bartlett, J. C. *et al.* Development of tools to automate quantitative  
562 analysis of radiation damage in SAXS experiments. *J. Synchrotron Radiat.* **24**,  
563 63–72 (2017).
- 564 43. Kikhney, A. G. & Svergun, D. I. A practical guide to small angle X-ray scattering  
565 (SAXS) of flexible and intrinsically disordered proteins. *FEBS Lett.* **589**, 2570–  
566 2577 (2015).
- 567 44. Sato, D. *et al.* Electrostatic Repulsion during Ferritin Assembly and Its Screening  
568 by Ions. *Biochemistry* **55**, 482–488 (2016).
- 569 45. Watt, R. K., Hilton, R. J. & Graff, D. M. Oxido-reduction is not the only  
570 mechanism allowing ions to traverse the ferritin protein shell. *Biochimica et*  
571 *Biophysica Acta - General Subjects* **1800**, 745–759 (2010).
- 572 46. Bakker, G. R. & Boyer, R. F. Iron incorporation into apoferritin. The role of  
573 apoferritin as a ferroxidase. *J. Biol. Chem.* **261**, 13182–13185 (1986).
- 574 47. Rui, H., Rivera, M. & Im, W. Protein dynamics and ion traffic in bacterioferritin.  
575 *Biochemistry* **51**, 9900–9910 (2012).
- 576 48. Kegel, W. K. & van der Schoot, P. Competing Hydrophobic and Screened-  
577 Coulomb Interactions in Hepatitis B Virus Capsid Assembly. *Biophys. J.* **86**,  
578 3905–3913 (2004).
- 579 49. Silva, J. Pressure Stability of Proteins. *Annu. Rev. Phys. Chem.* **44**, 89–113  
580 (1993).
- 581 50. Silva, J. L., Foguel, D. & Royer, C. A. Pressure provides new insights into protein  
582 folding, dynamics and structure. *Trends Biochem. Sci.* **26**, 612–618 (2001).
- 583 51. Silva, J. L. & Weber, G. Pressure-induced dissociation of brome mosaic virus.

- 584 *J. Mol. Biol.* **199**, 149–159 (1988).
- 585 52. Leimkühler, M., Goldbeck, A., Lechner, M. D. & Witz, J. Conformational changes  
586 preceding decapsidation of bromegrass mosaic virus under hydrostatic  
587 pressure: A small-angle neutron scattering study. *J. Mol. Biol.* **296**, 1295–1305  
588 (2000).
- 589 53. Leimkühler, M. *et al.* The formation of empty shells upon pressure induced  
590 decapsidation of turnip yellow mosaic virus. *Arch. Virol.* **146**, 653–667 (2001).
- 591 54. Teale, F. W. J. Cleavage of the haem-protein link by acid methylethylketone.  
592 *BBA - Biochim. Biophys. Acta* **35**, 543 (1959).
- 593 55. Nayuk, R. & Klaus, H. Formfactors of Hollow and Massive Rectangular  
594 Parallelepipeds at Variable Degree of Anisometry. *Zeitschrift für Physikalische*  
595 *Chemie* **226**, 837 (2012).
- 596 56. Willies, S. C., Isupov, M. N., Garman, E. F. & Littlechild, J. A. The binding of  
597 haem and zinc in the 1.9 Å X-ray structure of Escherichia coli bacterioferritin. *J.*  
598 *Biol. Inorg. Chem.* **14**, 201–207 (2009).
- 599 57. Hingorani, K. *et al.* Photo-oxidation of tyrosine in a bio-engineered  
600 bacterioferritin ‘reaction centre’ - A protein model for artificial photosynthesis.  
601 *Biochim. Biophys. Acta - Bioenerg.* **1837**, 1821–1834 (2014).
- 602 58. Ardejani, M. S., Li, N. X. & Orner, B. P. Stabilization of a protein nanocage  
603 through the plugging of a protein-protein interfacial water pocket. *Biochemistry*  
604 **50**, 4029–4037 (2011).
- 605 59. Wong, S. G. *et al.* Structural and mechanistic studies of a stabilized subunit  
606 dimer variant of Escherichia coli bacterioferritin identify residues required for  
607 core formation. *J. Biol. Chem.* **284**, 18873–18881 (2009).
- 608 60. Fan, R., Boyle, A. L., Vee, V. C., See, L. N. & Orner, B. P. A helix swapping

- 609 study of two protein cages. *Biochemistry* **48**, 5623–5630 (2009).
- 610 61. Hargrove, M. S. *et al.* Stability of Myoglobin: A Model for the Folding of Heme  
611 Proteins. *Biochemistry* **33**, 11767–11775 (1994).
- 612 62. Andrews, S. C. *et al.* Overproduction, purification and characterization of the  
613 bacterioferritin of *Escherichia coli* and a C-terminally extended variant. *Eur. J.*  
614 *Biochem.* **213**, 329–338 (1993).
- 615 63. Basham, M. *et al.* Data Analysis Workbench (DAWN). *J. Synchrotron Radiat.*  
616 **22**, 853–858 (2015).
- 617 64. Hussain, R., Jávorfí, T. & Siligardi, G. Circular dichroism beamline B23 at the  
618 Diamond Light Source. *J. Synchrotron Radiat.* **19**, 132–135 (2012).
- 619 65. De Val, N., Declercq, J. P., Lim, C. K. & Crichton, R. R. Structural analysis of  
620 haemin demetallation by L-chain apoferritins. *J. Inorg. Biochem.* **112**, 77–84  
621 (2012).
- 622 66. Chen, C. R. & Makhatadze, G. I. ProteinVolume: calculating molecular van der  
623 Waals and void volumes in proteins. *BMC Bioinformatics* **16**, 101 (2015).
- 624 67. Demeler, B. *et al.* Characterization of size, anisotropy, and density heterogeneity  
625 of nanoparticles by sedimentation velocity. *Anal. Chem.* **86**, 7688–7695 (2014).
- 626 68. Wald, A. & Wolfowitz, J. On a Test Whether Two Samples are from the Same  
627 Population. *Ann. Math. Stat.* **11**, 147–162 (1940).
- 628 69. Hansen, S. BayesApp: A web site for indirect transformation of small-angle  
629 scattering data. *J. Appl. Crystallogr.* **45**, 566–567 (2012).

630

631

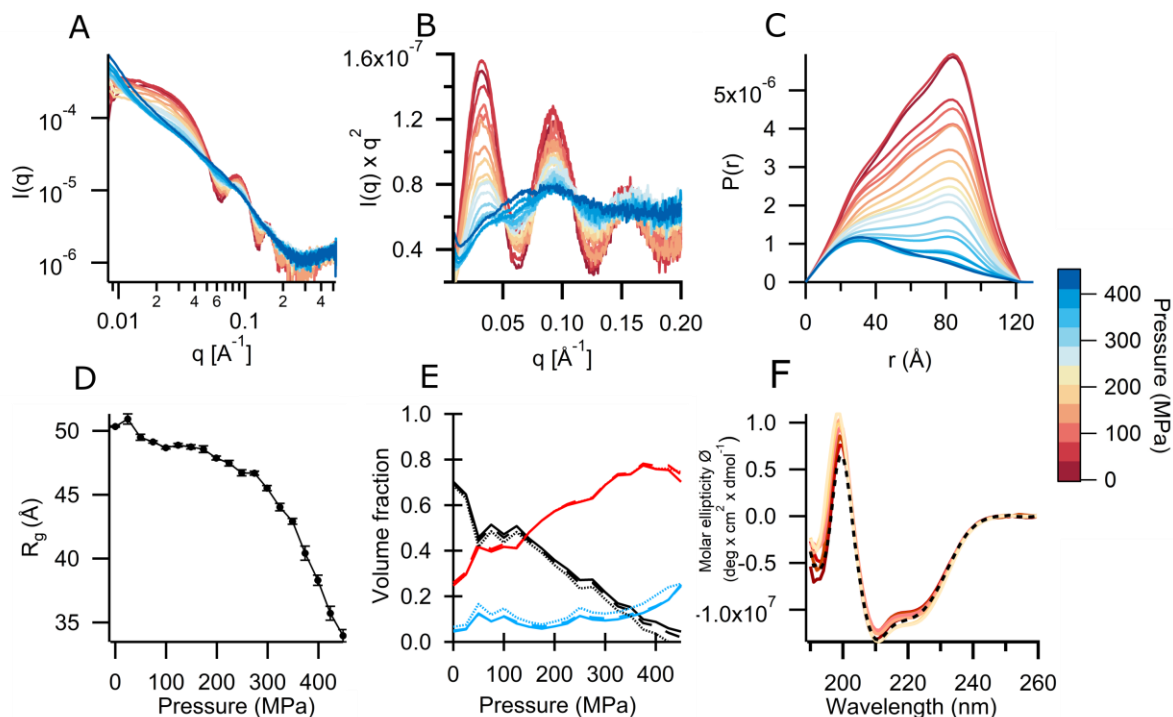

632  
633 **Figure 1. Pressure dissociation of ABfr under equilibrium conditions between 0.1 and 450 MPa**  
634 **measured using high pressure synchrotron radiation SAXS and circular dichroism. (A)**  
635 **Reciprocal space SAXS profiles, (B) Kratky plots, (C) pair distance distribution (P(r)) functions, (D)**  
636 **change in radius of gyration,  $R_g$ , with pressure, (E) change in solution oligomer composition with**  
637 **pressure and (F) circular dichroism spectra. SAXS data were collected between 0.1 MPa (red) and 450**  
638 **MPa (blue) at a protein concentration of 5 mg mL<sup>-1</sup> in 45 mM sodium phosphate buffer (pH 7). Real**  
639 **space transformations were performed using BAYESAPP, which uses Bayesian analysis to select**  
640 **parameters such as  $D_{max}$  and data noise level.<sup>69</sup>  $I(0)$  and  $R_g$  were calculated from real space data.  $I(0)$**   
641 **was normalised to a maximum value of 1. Component volume fraction versus pressure generated from**  
642 **OLIGOMER models of ABfr dissociation. The volume fractions of the icositetramer,  $n$ -mer and dimer**  
643 **are shown in black, blue and red respectively. The intermediate oligomer states are hexamer (solid**  
644 **line), octamer (dashed line) and dodecamer (dotted line). High-pressure circular dichroism data was**  
645 **collected between 0.1 (red) and 200 MPa (yellow) at a protein concentration of 0.03 mg mL<sup>-1</sup>, 45 mM**  
646 **sodium phosphate, pH 7.**

647  
648  
649  
650  
651  
652  
653  
654  
655  
656  
657  
658  
659  
660  
661

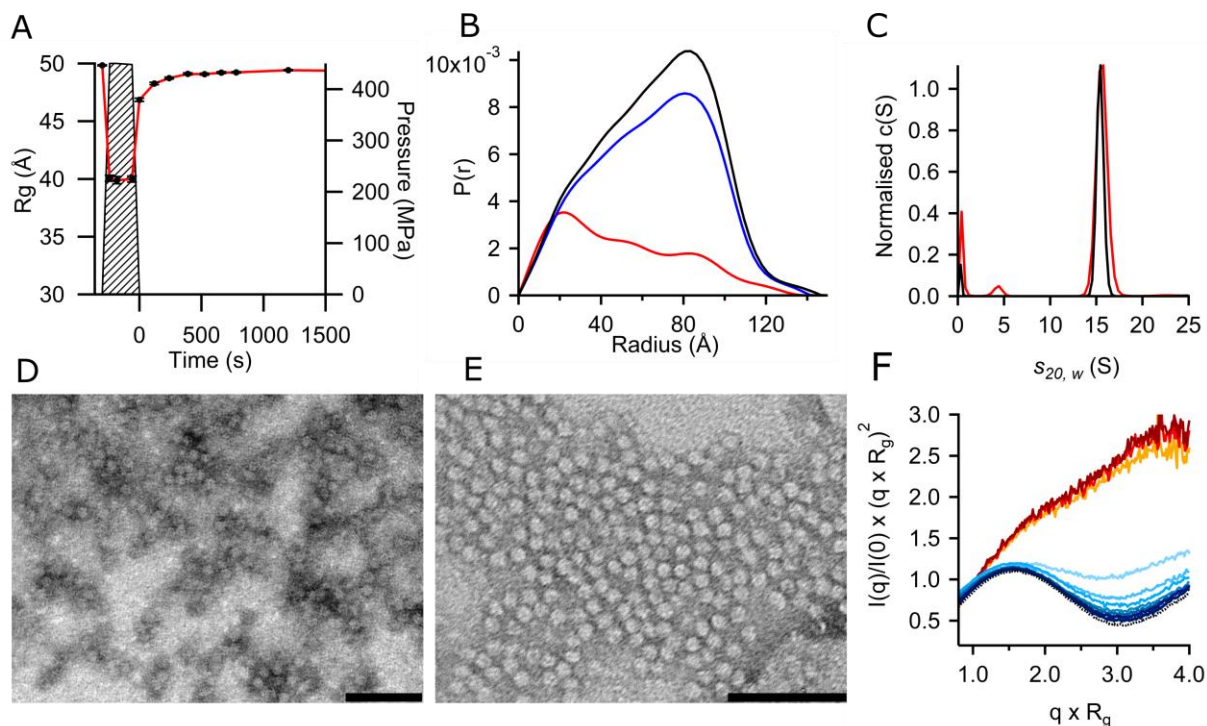

662  
 663 **Figure 2. Reassociation of ABfr following pressure induced dissociation measured by SAXS,**  
 664 **AUC and TEM. (A)** Changes in ABfr  $R_g$  pre, during and post- pressurization measured by SAXS.  
 665 Pressure cycle was performed at 25°C NaPi (45 mM, pH 7, I = 123 mM). **(B)** Pair distance distribution  
 666 ( $P(r)$ ) functions for ABfr pre- (black), during (red) and post- pressurisation (blue). **(C)** Sedimentation  
 667 velocity  $c(S)$  distribution for ABfr pre-pressurisation (black) and post-pressurisation (red). Sedimentation  
 668 velocity was measured at a protein concentration of approximately 50  $\mu\text{M}$  in sodium phosphate buffer  
 669 (45 mM NaPi, 250 mM NaCl, pH 7) using a Beckmann ProteomeLab XL-I at 20°C and 24000 rpm. Data  
 670 was collected at a wavelength of 418 nm. Data file time stamps were corrected using REDATE, and  
 671 continuous sedimentation coefficient ( $c(S)$ ) distributions were fitted using SEDFIT. Buffer density ( $\rho =$   
 672 1.003 g  $\text{cm}^{-3}$ ) and viscosity ( $\eta = 1.0107 \text{ mPa s}$ ) were measured using an Anton-Paar rolling ball  
 673 viscometer. **(D)** Negative stain (phosphotungstic acid) TEM images of ABfr pre-pressurisation and **(E)**  
 674 and post-pressurisation (scale bars = 100 nm). **(F)** Change in normalised Kratky intensity  
 675 ( $I(q=1.1)/I(0) \times (q \times R_g)^2$ ) with pre, during and post- pressurization. Dotted black trace shows pre-  
 676 pressurisation data, yellow – red traces show pressurised data at 0, 120 and 300s, light blue – dark  
 677 blue traces show post pressurisation data with increasing time.  
 678

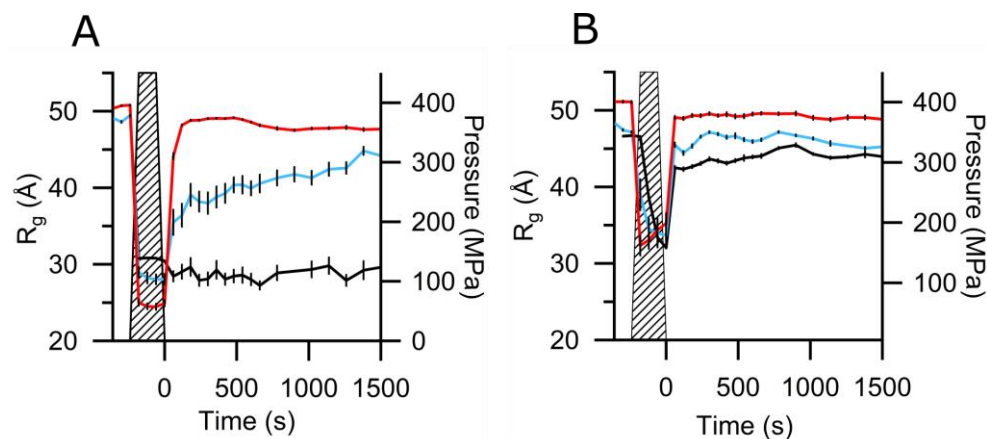

679  
680  
681  
682  
683

**Figure 3. Changes in ABfr  $R_g$  pre, during and post-pressurisation.** Pressure cycles were performed at 5 °C (A) and 25 °C (B) in H<sub>2</sub>O (I = 0 mM, black), NaPi (45 mM, pH 7, I = 123 mM, blue) and in NaPi (45 mM, pH 7) + NaCl (250 mM) (I = 373 mM, red). Pressure level depicted as hashed region.

684

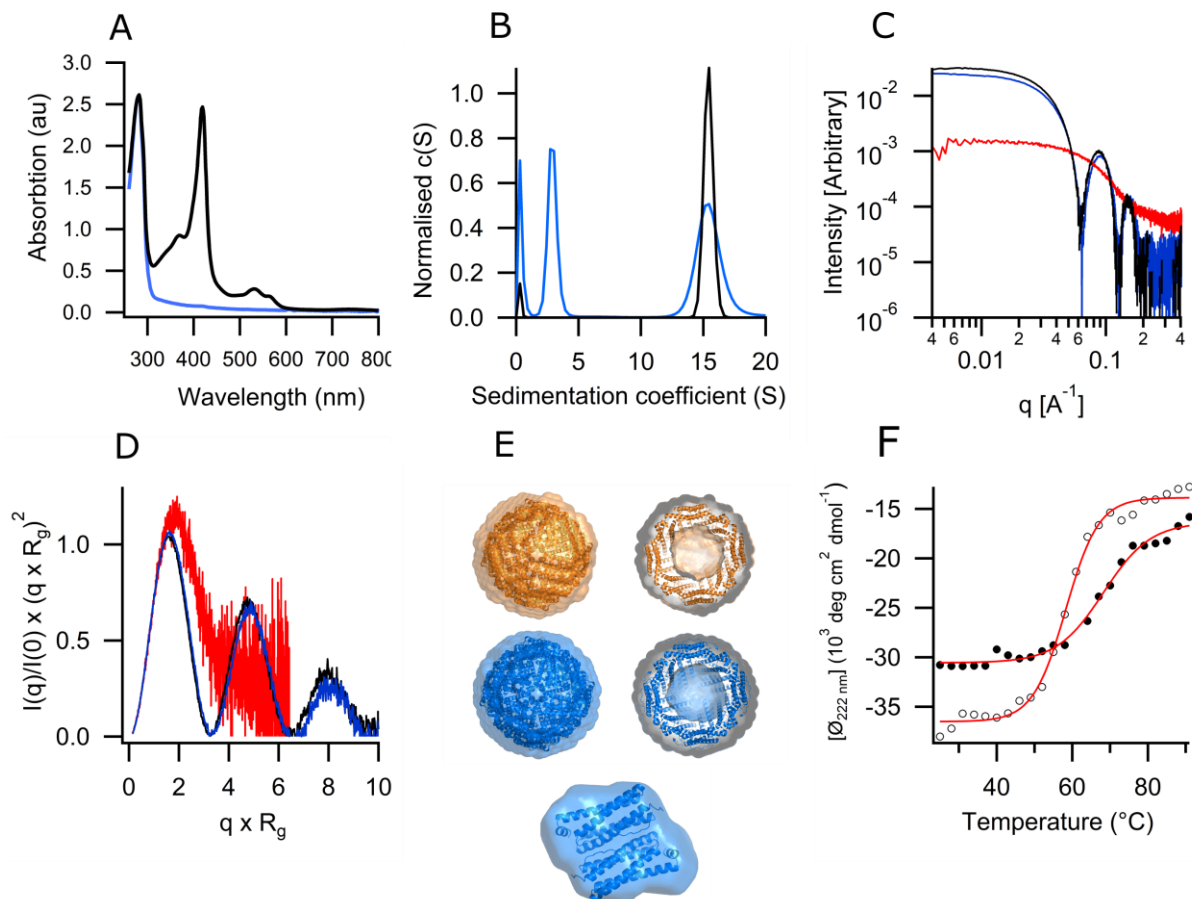

685  
686  
687  
688  
689  
690  
691  
692  
693  
694  
695  
696  
697  
698  
699  
700  
701  
702  
703  
704  
705  
706  
707  
708  
709  
710  
711  
712  
713  
714

**Figure 4. Physicochemical characterization of ABfr and AABfr under ambient pressure. (A)** UV/visible spectra of ABfr (black) and AABfr (blue). UV-visible spectra were recorded measured at a protein concentration of approximately 50  $\mu\text{M}$  in sodium phosphate buffer (45 mM NaPi, 250 mM NaCl, pH 7). Curves are normalised to  $A_{280} = 1$  to highlight differences in heme absorbance. **(B)** SV-AUC  $c(s)$  distributions for ABfr (black) and AABR (blue). Sedimentation velocity was measured at a protein concentration of approximately 50  $\mu\text{M}$  in potassium phosphate buffer (45 mM KPi, 250 mM NaCl, pH 7) using a Beckmann ProteomeLab XL-I at 20°C and 24000 rpm. Data was collected at a wavelength of 280 nm. Data file time stamps were corrected using REDATE, and continuous sedimentation coefficient ( $c(S)$ ) distributions were fitted using SEDFIT. Buffer density ( $\rho = 1.003 \text{ g cm}^{-3}$ ) and viscosity ( $\eta = 1.0107 \text{ mPa s}$ ) were measured using an Anton-Paar rolling ball viscometer. The protein partial specific volume was calculated from the primary sequence ( $\bar{v} = 0.736 \text{ cm}^3 \text{ g}^{-1}$ ). **(C)** HPLC-SAXS profiles and **(D)** Kratky plots for ABfr icositetramer (black) and AABfr icositetramer (blue) and dimer (red). **(E)** *Ab initio* bead model of ABfr (icositetramer, orange) and AABfr (icositetramer and dimer, blue), overlaid with corresponding crystal structures (2VXI and 4CVP)<sup>56,57</sup>. Real space transformations were performed using ScÅtter. The maximum diameter was determined by selecting values that resulted in high reciprocal fit quality, and produced smooth, oscillation-free, real-space functions that decreased smoothly to zero at high radius. A constant background was applied in the transformation, and real space distributions were refined using the L1 norm of the Moore coefficients as a regularisation target. The *ab initio* models were produced from refined pair distance distribution functions using DAMMIF, and are DAMAVER averages of 23 runs. The models and crystal structures were visualized using PyMOL. **(F)** Thermal denaturation far-UV circular dichroism spectra and fits for ABfr (open circles) and AABfr (black circles). Data were collected at B23, Diamond Light Source, UK. Measurements were performed in potassium phosphate buffer (45 mM, pH 7) at a protein concentration of 0.5  $\text{g L}^{-1}$ . Raw data was converted to mean residue ellipticity and secondary structure analysis was performed using CAPITO.

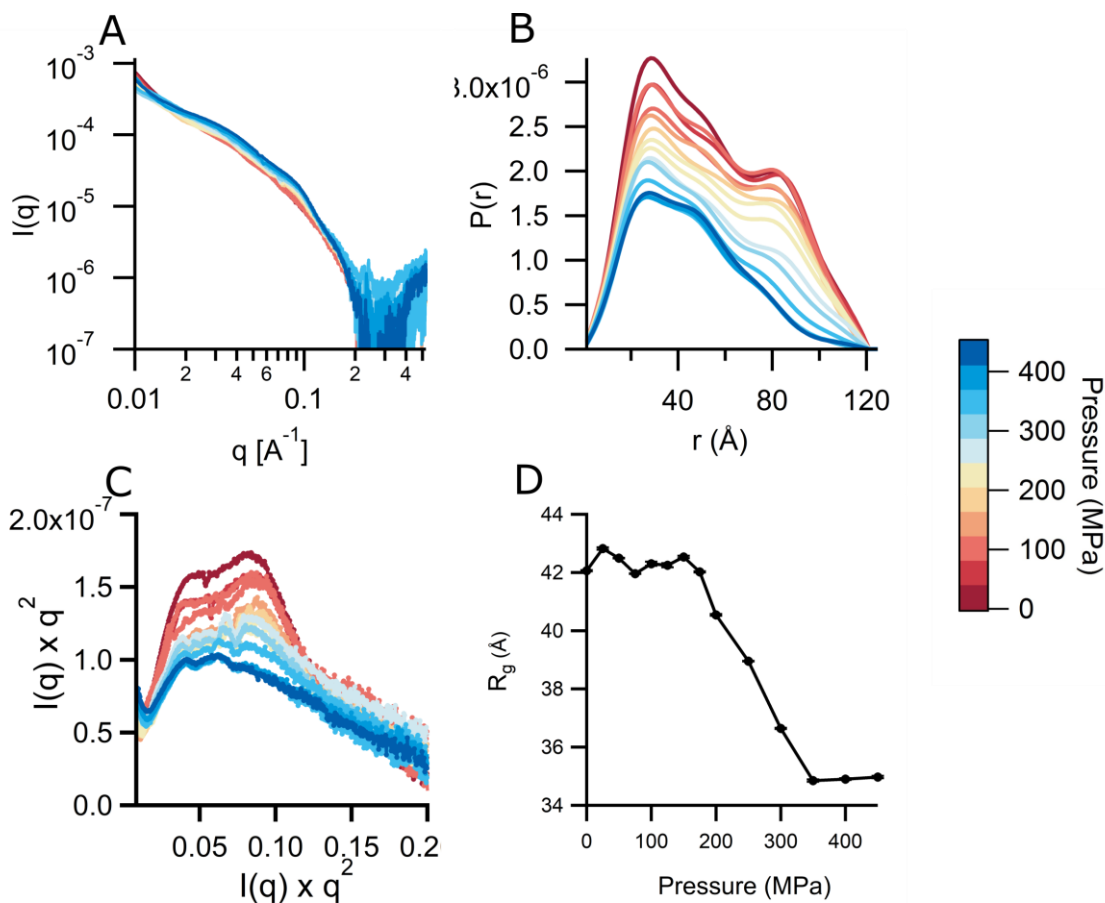

715

716 **Figure 5. Pressure dissociation of AABfr under equilibrium conditions between 0.1 and 450 MPa.**

717 **(A)** reciprocal space SAXS profiles, **(B)** Pair distance distribution ( $P(r)$ ) functions, **(C)** Kratky plots and  
718 **(D)** Radius of gyration,  $R_g$ . SAXS data was collected between 0.1 MP (red) and 450 MPa (blue) at a  
719 protein concentration of 5 mg mL<sup>-1</sup> in 45 mM sodium phosphate buffer (pH 7). Real space  
720 transformations were performed using BAYESAPP, which uses Bayesian analysis to select parameters  
721 such as  $D_{\max}$  and data noise level.<sup>69</sup>  $I(0)$  and  $R_g$  were calculated from real space data.  $I(0)$  was  
722 normalised to a maximum value of 1.

723
